# Supplementary material for: Biological constraints on GWAS SNPs at suggestive significance thresholds reveal additional BMI loci
Source: eLife. 2021 Jan 18;10:e62206. doi: 10.7554/eLife.62206 (PMC7815306; doi:10.7554/eLife.62206)
Supplement: Figure 2—source data 1. [file elife-62206-fig2-data1.csv]

	Adipose	HypothalamicNeurons	All Cells
5x10^-7	3/3	1/1	4/4
5x10^-6	4/4	2/2	4/4
5x10^-5	6/13	2/5	6/15
5x10^-4	9/55	4/41	11/78
