# Supplementary material for: Biological constraints on GWAS SNPs at suggestive significance thresholds reveal additional BMI loci
Source: eLife. 2021 Jan 18;10:e62206. doi: 10.7554/eLife.62206 (PMC7815306; doi:10.7554/eLife.62206)
Supplement: Figure 5—source data 1. [file elife-62206-fig5-data1.csv]

	Adipose	HypothalamicNeurons	All Cells
5x10^-7	7/7	3/3	8/8
5x10^-6	22/23	9/10	26/28
5x10^-5	49/60	28/34	57/71
5x10^-4	89/143	59/90	117/184
