# Supplementary material for: Biological constraints on GWAS SNPs at suggestive significance thresholds reveal additional BMI loci
Source: eLife. 2021 Jan 18;10:e62206. doi: 10.7554/eLife.62206 (PMC7815306; doi:10.7554/eLife.62206)
Supplement: Figure 6—figure supplement 2—source data 1. [file elife-62206-fig6-figsupp2-data1.csv]

	Adipose	HypothalamicNeuron	All Cells
5x10^-7	1/1	1/1	1/1
5x10^-6	4/6	2/2	4/6
5x10^-5	10/19	5/8	11/20
5x10^-4	13/62	5/30	14/71
