# Supplementary material for: Biological constraints on GWAS SNPs at suggestive significance thresholds reveal additional BMI loci
Source: eLife. 2021 Jan 18;10:e62206. doi: 10.7554/eLife.62206 (PMC7815306; doi:10.7554/eLife.62206)
Supplement: Figure 6—figure supplement 3—source data 1. [file elife-62206-fig6-figsupp3-data1.csv]

	Adipose	All Cells
5x10^-7	3/4	3/4
5x10^-6	9/11	9/11
5x10^-5	27/36	27/36
5x10^-4	58/100	58/100
