# Supplementary material for: Biological constraints on GWAS SNPs at suggestive significance thresholds reveal additional BMI loci
Source: eLife. 2021 Jan 18;10:e62206. doi: 10.7554/eLife.62206 (PMC7815306; doi:10.7554/eLife.62206)
Supplement: Figure 6—source data 2. [file elife-62206-fig6-data2.csv]

	2010 Suggestive SNPs Reaching GWS in 2018
5x10^-7	3/4
5x10^-6	20/32
5x10^-5	46/110
5x10^-4	121/553
