# Supplementary material for: Biological constraints on GWAS SNPs at suggestive significance thresholds reveal additional BMI loci
Source: eLife. 2021 Jan 18;10:e62206. doi: 10.7554/eLife.62206 (PMC7815306; doi:10.7554/eLife.62206)
Supplement: Figure 7—source data 1. [file elife-62206-fig7-data1.csv]

	Adipose	HypothalamicNeuron	All Cells
5x10^-7	11/16	13/18	10/15
5x10^-6	33/51	35/53	33/51
5x10^-5	93/150	101/158	92/148
5x10^-4	227/536	239/550	216/512
