# Supplementary material for: Biological constraints on GWAS SNPs at suggestive significance thresholds reveal additional BMI loci
Source: eLife. 2021 Jan 18;10:e62206. doi: 10.7554/eLife.62206 (PMC7815306; doi:10.7554/eLife.62206)
Supplement: Figure 8—source data 1. [file elife-62206-fig8-data1.csv]

	Adipose	HypothalamicNeurons	All Cells
5x10^-7	2/3	2/3	2/3
5x10^-6	15/26	18/30	15/26
5x10^-5	34/91	39/102	33/90
5x10^-4	88/491	105/523	85/482
