# Supplementary material for: Biological constraints on GWAS SNPs at suggestive significance thresholds reveal additional BMI loci
Source: eLife journal article supplement (doi:10.7554/elife.62206), 2021-01-18
Supplement: supp [file 2010-BMI_ConstrainedCounts.xlsx]

## Sheet: Adipose
Band Level	Starting SNPs	Starting SNPs After GWS Proxies Removed	Starting Proxies	Starting Clusters	Constrained Proxies	Constrained Clusters
5 x 10-7	310	125	548	19	4	3
5 x 10-6	700	352	1199	55	6	4
5 x 10-5	1873	1315	6319	163	18	13
5 x 10-4	6553	5774	23197	591	113	55

## Sheet: Hypothalamic Neuron
Band Level	Starting SNPs	Starting SNPs After GWS Proxies Removed	Starting Proxies	Starting Clusters	Constrained Proxies	Constrained Clusters
5 x 10-7	310	125	548	19	3	1
5 x 10-6	700	352	1199	55	6	2
5 x 10-5	1873	1315	6319	163	10	5
5 x 10-4	6553	5774	23197	591	68	41

## Sheet: All Cells
Band Level	Starting SNPs	Starting SNPs After GWS Proxies Removed	Starting Proxies	Starting Clusters	Constrained Proxies	Constrained Clusters
5 x 10-7	310	125	548	19	7	4
5 x 10-6	700	352	1199	55	12	4
5 x 10-5	1873	1315	6319	163	28	15
5 x 10-4	6553	5774	23197	591	161	78
