# Supplementary material for: Biological constraints on GWAS SNPs at suggestive significance thresholds reveal additional BMI loci
Source: eLife journal article supplement (doi:10.7554/elife.62206), 2021-01-18
Supplement: supp [file 2010-WHRadjBMI_ConstrainedCounts.xlsx]

## Sheet: Adipose
Band Level	Starting SNPs	Starting SNPs After GWS Proxies Removed	Starting Proxies	Starting Clusters	Constrained Proxies	Constrained Clusters
5 x 10-7	77	13	127	4	3	1
5 x 10-6	282	150	859	32	11	6
5 x 10-5	901	601	3024	110	37	19
5 x 10-4	3572	3177	15457	553	125	62

## Sheet: Hypothalamic Neuron
Band Level	Starting SNPs	Starting SNPs After GWS Proxies Removed	Starting Proxies	Starting Clusters	Constrained Proxies	Constrained Clusters
5 x 10-7	77	13	127	4	4	1
5 x 10-6	282	150	859	32	5	2
5 x 10-5	901	601	3024	110	14	8
5 x 10-4	3572	3177	15457	553	46	30

## Sheet: All Cells
Band Level	Starting SNPs	Starting SNPs After GWS Proxies Removed	Starting Proxies	Starting Clusters	Constrained Proxies	Constrained Clusters
5 x 10-7	77	13	127	4	5	1
5 x 10-6	282	150	859	32	13	6
5 x 10-5	901	601	3024	110	46	20
5 x 10-4	3572	3177	15457	553	157	71
