# Supplementary material for: Biological constraints on GWAS SNPs at suggestive significance thresholds reveal additional BMI loci
Source: eLife journal article supplement (doi:10.7554/elife.62206), 2021-01-18
Supplement: supp [file 2015-BMI_ConstrainedCounts .xlsx]

## Sheet: Adipose
Band Level	Starting SNPs	Starting SNPs After GWS Proxies Removed	Starting Proxies	Starting Clusters	Constrained Proxies	Constrained Clusters
5 x 10-7	628	120	1698	65	11	7
5 x 10-6	1978	641	6234	173	44	24
5 x 10-5	4893	2642	16940	421	118	62
5 x 10-4	12499	8716	46120	1195	304	105

## Sheet: Hypothalamic Neuron
Band Level	Starting SNPs	Starting SNPs After GWS Proxies Removed	Starting Proxies	Starting Clusters	Constrained Proxies	Constrained Clusters
5 x 10-7	628	120	1698	65	3	3
5 x 10-6	1978	641	6234	173	14	10
5 x 10-5	4893	2642	16940	421	53	35
5 x 10-4	12499	8716	46120	1195	141	92

## Sheet: All Cells
Band Level	Starting SNPs	Starting SNPs After GWS Proxies Removed	Starting Proxies	Starting Clusters	Constrained Proxies	Constrained Clusters
5 x 10-7	628	120	1698	65	13	8
5 x 10-6	1978	641	6234	173	54	28
5 x 10-5	4893	2642	16940	421	142	71
5 x 10-4	12499	8716	46120	1195	383	184
