# Supplementary material for: Biological constraints on GWAS SNPs at suggestive significance thresholds reveal additional BMI loci
Source: eLife journal article supplement (doi:10.7554/elife.62206), 2021-01-18
Supplement: supp [file 2015-WHRadjBMI_ConstrainedCounts.xlsx]

## Sheet: Adipose
Band Level	Starting SNPs	Starting SNPs After GWS Proxies Removed	Starting Proxies	Starting Clusters	Constrained Proxies	Constrained Clusters
5 x 10-7	232	45	416	37	7	4
5 x 10-6	784	236	1889	125	19	11
5 x 10-5	2117	1100	6520	319	68	36
5 x 10-4	6085	4335	23284	968	204	107

## Sheet: Hypothalamic Neuron
Band Level	Starting SNPs	Starting SNPs After GWS Proxies Removed	Starting Proxies	Starting Clusters	Constrained Proxies	Constrained Clusters
5 x 10-7	232	45	416	37	2	2
5 x 10-6	784	236	1889	125	10	6
5 x 10-5	2117	1100	6520	319	35	19
5 x 10-4	6085	4335	23284	968	100	57

## Sheet: All Cells
Band Level	Starting SNPs	Starting SNPs After GWS Proxies Removed	Starting Proxies	Starting Clusters	Constrained Proxies	Constrained Clusters
5 x 10-7	232	45	416	37	7	4
5 x 10-6	784	236	1889	125	18	11
5 x 10-5	2117	1100	6520	319	64	36
5 x 10-4	6085	4335	23284	968	193	100
