# Supplementary material for: Biological constraints on GWAS SNPs at suggestive significance thresholds reveal additional BMI loci
Source: eLife journal article supplement (doi:10.7554/elife.62206), 2021-01-18
Supplement: supp [file InteractingGenes-Merged.xlsx]

## Sheet: BMI 2010-2015 Interacting Genes
SNP ID	2018 Sentinel SNP	Locus Name (If assigned in 2015)	Location of Sentinel	Interacting Gene Name	Lowest Threshold Found
rs72705210	rs17024393	GNAT2(N); AMPD2(D)	1:110154687-110154688	GSTM3,AHCYL1	5x10^-4
rs12086240	rs1032524	NAV1(N)	1:201790825-201790826	TIMM17A	5x10^-5
rs2820315	rs2820315	NAV1(N)	1:201872263-201872264	TIMM17A	5x10^-5
rs12713419	rs13412941	ADCY3(B,M,N,Q); POMC(B,G); NCOA1(B); SH2B1(B,M,Q); APOBR(M,Q);	2:25102708-25102709	ADCY3	5x10^-4
rs13012304	rs13412941	ADCY3(B,M,N,Q); POMC(B,G); NCOA1(B); SH2B1(B,M,Q); APOBR(M,Q);	2:25102708-25102709	ADCY3	5x10^-4
rs7597332	rs6545790	ADCY3(B,M,N,Q); POMC(B,G); NCOA1(B); SH2B1(B,M,Q); APOBR(M,Q);	2:25109301-25109302	TCONS_00003602	5x10^-6
rs7608976	rs6545790	ADCY3(B,M,N,Q); POMC(B,G); NCOA1(B); SH2B1(B,M,Q); APOBR(M,Q);	2:25109301-25109302	TCONS_00003602	5x10^-6
rs6718510	rs10182181	ADCY3(B,M,N,Q); POMC(B,G); NCOA1(B); SH2B1(B,M,Q); APOBR(M,Q);	2:25150295-25150296	ADCY3	5x10^-7
rs10810462	rs4740619	C9orf93(C,M,N)	9:15634325-15634326	TCONS_00015651	5x10^-4
rs117597828	rs17094222	HIF1AN(N)	10:102395439-102395440	PAX2	5x10^-4
rs10840079	rs4244804	TRIM66(D,M,N); TUB(B)	11:8617549-8617550	RPL27A	5x10^-7
rs10840087	rs4929942	TRIM66(D,M,N); TUB(B)	11:8625095-8625096	RPL27A	5x10^-7
rs11041999	rs4929942	TRIM66(D,M,N); TUB(B)	11:8625095-8625096	RPL27A	5x10^-7
rs4256980	rs4256980	TRIM66(D,M,N); TUB(B)	11:8673938-8673939	TRIM66	5x10^-6
rs11042023	rs4256980	TRIM66(D,M,N); TUB(B)	11:8673938-8673939	TRIM66	5x10^-6
rs12803166	rs4256980	TRIM66(D,M,N); TUB(B)	11:8673938-8673939	RPL27A,TRIM66	5x10^-6
rs7988412	rs9579083	MTIF3(N); GTF3A(Q)	13:28017269-28017270	MTIF3	5x10^-7
rs7183479	rs3736485	SCG3(B,D); DMXL2(M,N)	15:51748609-51748610	LYSMD2,SCG3,CTD-2308G16.1,TMOD2	5x10^-4
rs2238435	rs879620	NLRC3(N)	16:4015728-4015729	TCONS_00024950,TCONS_00024564,TCONS_00024949,TCONS_00024562,RP11-462G12.1,TCONS_00024568,TCONS_00024570,RP11-95P2.1,TCONS_00024567,TCONS_00024569,TCONS_00024320,TCONS_00024952	5x10^-5
rs1788783	rs2510344	NPC1(B,G,M,Q); C18orf8(N,Q)	18:21113284-21113285	NPC1	5x10^-4
rs11672660	rs2287019	QPCTL(N); GIPR(B,M)	19:46202171-46202172	GIPR	5x10^-7
rs34783010	rs2287019	QPCTL(N); GIPR(B,M)	19:46202171-46202172	GIPR	5x10^-7

## Sheet: BMI 2010-2018
SNP ID	2018 Sentinel SNP	Locus Name (If assigned in 2015)	Location of Sentinel	Interacting Gene Name	Lowest Threshold Found
rs6424062	rs4648360		1:2723344-2723345	TCONS_00001923	5x10^-5
rs11581010	rs2791653		1:11129847-11129848	MTOR-AS1,ANGPTL7	5x10^-4
rs1884429	rs2791653		1:11129847-11129848	SRM	5x10^-4
rs10864490	rs2791653		1:11129847-11129848	MTOR-AS1,ANGPTL7	5x10^-4
rs12041740	rs2791653		1:11129847-11129848	MTOR-AS1,ANGPTL7	5x10^-4
rs12729914	rs12049202	FUBP1(N); USP33(D)	1:77967522-77967523	PIGK,TCONS_00000998,TCONS_00000997	5x10^-5
rs12077442	rs10747492		1:98342416-98342417	MIR137HG	5x10^-4
rs72705210	rs7550711	GNAT2(N); AMPD2(D)	1:110082885-110082886	GSTM3,AHCYL1	5x10^-4
rs10788800	rs4357530		1:151103152-151103153	TNFAIP8L2,SCNM1	5x10^-5
rs11264483	rs11264483		1:156406380-156406381	TCONS_l2_00001558,TCONS_l2_00001557,RP11-98G7.1	5x10^-4
rs2274319	rs12136856		1:156473113-156473114	MEF2D,TCONS_00002182,TCONS_00001172,TCONS_l2_00001558,TCONS_l2_00001557,RP11-98G7.1,TCONS_00001690,RP11-284F21.8,GPATCH4,IQGAP3	5x10^-4
rs12038396	rs12136856		1:156473113-156473114	MEF2D,IQGAP3,TCONS_l2_00001558,TCONS_l2_00001557,RP11-98G7.1,TCONS_00002182,TCONS_00001172	5x10^-4
rs1925950	rs12136856		1:156473113-156473114	MEF2D,TCONS_00002182,TCONS_00001172,TCONS_l2_00001558,TCONS_l2_00001557,RP11-98G7.1,TCONS_00001690,RP11-284F21.8,GPATCH4,IQGAP3	5x10^-4
rs3818463	rs12136856		1:156473113-156473114	TCONS_l2_00001558,TCONS_l2_00001557,RP11-98G7.1,GPATCH4,IQGAP3,MEF2D	5x10^-4
rs2274320	rs12136856		1:156473113-156473114	TCONS_l2_00001558,TCONS_l2_00001557,RP11-98G7.1,GPATCH4,IQGAP3,MEF2D	5x10^-4
rs2274317	rs12136856		1:156473113-156473114	IQGAP3,MEF2D,GPATCH4,RP11-98G7.1,TCONS_l2_00001557,TCONS_l2_00001558	5x10^-4
rs12086240	rs1032524	NAV1(N)	1:201790825-201790826	TIMM17A	5x10^-5
rs2820315	rs2820311	NAV1(N)	1:201841475-201841476	TIMM17A	5x10^-5
rs2047264	rs2644120	NAV1(N)	1:201882276-201882277	TIMM17A	5x10^-4
rs12713419	rs4077680	ADCY3(B,M,N,Q); POMC(B,G); NCOA1(B); SH2B1(B,M,Q); APOBR(M,Q);	2:25122941-25122942	ADCY3	5x10^-4
rs13012304	rs4077680	ADCY3(B,M,N,Q); POMC(B,G); NCOA1(B); SH2B1(B,M,Q); APOBR(M,Q);	2:25122941-25122942	ADCY3	5x10^-4
rs7597332	rs10203386	ADCY3(B,M,N,Q); POMC(B,G); NCOA1(B); SH2B1(B,M,Q); APOBR(M,Q);	2:25136865-25136866	TCONS_00003602	5x10^-6
rs7608976	rs10203386	ADCY3(B,M,N,Q); POMC(B,G); NCOA1(B); SH2B1(B,M,Q); APOBR(M,Q);	2:25136865-25136866	TCONS_00003602	5x10^-6
rs6718510	rs10182181	ADCY3(B,M,N,Q); POMC(B,G); NCOA1(B); SH2B1(B,M,Q); APOBR(M,Q);	2:25150295-25150296	ADCY3	5x10^-7
rs72951700	rs11684690		2:208230090-208230091	KLF7	5x10^-4
rs11677847	rs11684690		2:208230090-208230091	KLF7	5x10^-4
rs11689163	rs11684690		2:208230090-208230091	KLF7	5x10^-4
rs11694560	rs17203016		2:208255517-208255518	KLF7	5x10^-5
rs11692026	rs17203016		2:208255517-208255518	KLF7	5x10^-5
rs72966483	rs11692326		2:208263278-208263279	KLF7	5x10^-5
rs964622	rs4510210		2:208298671-208298672	KLF7,AC007879.5,TCONS_00005327,TCONS_00004565,TCONS_00005325	5x10^-4
rs964621	rs4510210		2:208298671-208298672	KLF7,AC007879.5,TCONS_00005327,TCONS_00004565,TCONS_00005325	5x10^-4
rs2252833	rs6792892		3:49995517-49995518	MIR5193,FAM212A,UBA7,TCONS_00006508	5x10^-4
rs3774758	rs6792892		3:49995517-49995518	TRAIP,MIR5193,FAM212A,UBA7,TCONS_00006508	5x10^-4
rs6446187	rs6792892		3:49995517-49995518	TRAIP	5x10^-4
rs13100903	rs13100903		3:50174571-50174572	SEMA3B,SEMA3B-AS1,TCONS_00006510,GNAI2,IFRD2	5x10^-4
rs2042864	rs9851256	RASA2(N)	3:141177844-141177845	ZBTB38	5x10^-4
rs3914188	rs3914188		3:184010047-184010048	ECE2,PARL,RP11-315J22.5,MIR4448,CYP2AB1P,EIF2B5,RP11-778D9.12,RP11-778D9.13,ABCF3,AP2M1	5x10^-4
rs35637422	rs3914188		3:184010047-184010048	MIR4448,PARL,RP11-315J22.5,CYP2AB1P,EIF2B5,RP11-778D9.12,RP11-778D9.13	5x10^-4
rs58434965	rs6784890		3:194842144-194842145	TCONS_l2_00019078,AC090505.6,TCONS_l2_00019079,AC090505.4,TCONS_00007330	5x10^-4
rs6921487	rs2281819	C6orf106(N); SNRPC(Q)	6:33771672-33771673	TCONS_00012148,TCONS_00011210,TCONS_00012701,TCONS_00011788,LINC01016,RP3-468B3.2,LEMD2,TCONS_00012479,TCONS_00012480,GRM4	5x10^-4
rs73746509	rs2281819	C6orf106(N); SNRPC(Q)	6:33771672-33771673	IP6K3,GRM4,MIR1275	5x10^-4
rs72880511	rs2281819	C6orf106(N); SNRPC(Q)	6:33771672-33771673	IP6K3,GRM4,MIR1275	5x10^-4
rs1887340	rs2281819	C6orf106(N); SNRPC(Q)	6:33771672-33771673	IP6K3,GRM4,MIR1275	5x10^-4
rs11752353	rs11752353	C6orf106(N); SNRPC(Q)	6:33795627-33795628	TCONS_00012479,TCONS_00012701,RP3-468B3.2,TCONS_00012148,LINC01016,TCONS_00012480,TCONS_00011788,TCONS_00011210,MIR1275	5x10^-4
rs3934393	rs10498767		6:46363556-46363557	ENPP4,RP1-8B1.4	5x10^-5
rs17258750	rs13201877		6:137675540-137675541	TCONS_00011961	5x10^-4
rs10810462	rs4740619	C9orf93(C,M,N)	9:15634325-15634326	TCONS_00015651	5x10^-4
rs1468648	rs7850697		9:131095111-131095112	TMSB4XP4,SLC27A4	5x10^-4
rs2240948	rs2286814		9:131133982-131133983	URM1	5x10^-4
rs7859557	rs2286814		9:131133982-131133983	URM1	5x10^-4
rs10761689	rs10761691		10:64833108-64833109	EGR2	5x10^-4
rs117597828	rs17094222	HIF1AN(N)	10:102395439-102395440	PAX2	5x10^-4
rs7085104	rs10786712	NT5C2(N); CYP17A1(B); SFXN2(Q)	10:104596395-104596396	AS3MT	5x10^-4
rs1926032	rs1926032	NT5C2(N); CYP17A1(B); SFXN2(Q)	10:104829468-104829469	CNNM2	5x10^-4
rs34009921	rs1867810	TRIM66(D,M,N); TUB(B)	11:8505527-8505528	RPL27A	5x10^-4
rs10840087	rs10769915	TRIM66(D,M,N); TUB(B)	11:8597448-8597449	RPL27A	5x10^-7
rs11041999	rs10769915	TRIM66(D,M,N); TUB(B)	11:8597448-8597449	RPL27A	5x10^-7
rs10840079	rs10769929	TRIM66(D,M,N); TUB(B)	11:8628055-8628056	RPL27A	5x10^-7
rs4256980	rs4929923	TRIM66(D,M,N); TUB(B)	11:8639199-8639200	TRIM66	5x10^-6
rs11042023	rs4929923	TRIM66(D,M,N); TUB(B)	11:8639199-8639200	TRIM66	5x10^-6
rs12803166	rs4929923	TRIM66(D,M,N); TUB(B)	11:8639199-8639200	RPL27A,TRIM66	5x10^-6
rs11605729	rs11605729		11:69277974-69277975	TCONS_00019368,TCONS_00019370,TCONS_00019369,CCND1	5x10^-4
rs869202	rs7117238		11:78040258-78040259	NARS2	5x10^-4
rs422022	rs417644	BCDIN3D(N); FAIM2(D)	12:50277425-50277426	TCONS_00020420,RP11-70F11.8,TCONS_00020421,TCONS_00021310,RP11-70F11.11,TCONS_00020187,TCONS_00020419,TCONS_00020169,TCONS_00020781	5x10^-4
rs10773037	rs7137049	CLIP1(N)	12:122493383-122493384	WDR66,TCONS_l2_00005951,TCONS_l2_00005952,TCONS_l2_00005954,TCONS_l2_00005950,TCONS_l2_00005955,TCONS_l2_00005956,TCONS_l2_00005953,AC156455.1,TCONS_l2_00005949,MLXIP	5x10^-4
rs28530689	rs7137049	CLIP1(N)	12:122493383-122493384	TCONS_l2_00005951,TCONS_l2_00005952,TCONS_l2_00005954,TCONS_l2_00005950,TCONS_l2_00005955,TCONS_l2_00005956,TCONS_l2_00005953,AC156455.1,TCONS_l2_00005949,IL31	5x10^-4
rs7299842	rs7137049	CLIP1(N)	12:122493383-122493384	TCONS_l2_00005955,AC156455.1,TCONS_l2_00005954,TCONS_l2_00005951,TCONS_l2_00005953,TCONS_l2_00005952,TCONS_l2_00005949,TCONS_l2_00005956,TCONS_l2_00005950	5x10^-4
rs36158849	rs7137049	CLIP1(N)	12:122493383-122493384	TCONS_l2_00005955,AC156455.1,TCONS_l2_00005954,TCONS_l2_00005951,TCONS_l2_00005953,TCONS_l2_00005952,TCONS_l2_00005949,TCONS_l2_00005956,TCONS_l2_00005950	5x10^-4
rs28737311	rs7137049	CLIP1(N)	12:122493383-122493384	MLXIP,WDR66,TCONS_l2_00005955,AC156455.1,TCONS_l2_00005954,TCONS_l2_00005951,TCONS_l2_00005953,TCONS_l2_00005952,TCONS_l2_00005949,TCONS_l2_00005956,TCONS_l2_00005950	5x10^-4
rs2280573	rs7137049	CLIP1(N)	12:122493383-122493384	TCONS_l2_00005956,TCONS_l2_00005955,TCONS_l2_00005952,TCONS_l2_00005951,TCONS_l2_00005950,TCONS_l2_00005953,AC156455.1,TCONS_l2_00005954,TCONS_l2_00005949	5x10^-4
rs7988412	rs9579083	MTIF3(N); GTF3A(Q)	13:28017269-28017270	MTIF3	5x10^-7
rs12887636	rs12887636	PRKD1(N)	14:29702589-29702590	C14orf23,RP11-966I7.1,FOXG1	5x10^-5
rs7183479	rs3736485	SCG3(B,D); DMXL2(M,N)	15:51748609-51748610	LYSMD2,SCG3,CTD-2308G16.1,TMOD2	5x10^-4
rs2238435	rs879620	NLRC3(N)	16:4015728-4015729	TCONS_00024950,TCONS_00024564,TCONS_00024949,TCONS_00024562,RP11-462G12.1,TCONS_00024568,TCONS_00024570,RP11-95P2.1,TCONS_00024567,TCONS_00024569,TCONS_00024320,TCONS_00024952	5x10^-5
rs2531993	rs2531992	NLRC3(N)	16:4021733-4021734	TCONS_00024950,TCONS_00024564,TCONS_00024949,TCONS_00024562,RP11-462G12.1,TCONS_00024568,TCONS_00024570,RP11-95P2.1,TCONS_00024567,TCONS_00024569,TCONS_00024320,TCONS_00024952	5x10^-4
rs710893	rs2531992	NLRC3(N)	16:4021733-4021734	TCONS_00024950,TCONS_00024564,TCONS_00024949,TCONS_00024562,RP11-462G12.1,TCONS_00024568,TCONS_00024570,RP11-95P2.1,TCONS_00024567,TCONS_00024569,TCONS_00024320,TCONS_00024952	5x10^-4
rs2001651	rs2001651		17:21179460-21179461	DHRS7B	5x10^-4
rs3785542	rs959511		17:21183192-21183193	DHRS7B	5x10^-4
rs9906072	rs4986044		17:21261559-21261560	KCNJ12	5x10^-4
rs16951519	rs16954324		17:46324583-46324584	MIR152,COPZ2,TCONS_00025686,TCONS_00025688,RP5-890E16.2,NFE2L1,TCONS_00025687	5x10^-5
rs2240121	rs16954324		17:46324583-46324584	MIR152,COPZ2,TCONS_00025686,TCONS_00025688,RP5-890E16.2,NFE2L1,TCONS_00025687	5x10^-5
rs2326013	rs12450225		17:46592412-46592413	HOXB3	5x10^-4
rs1788783	rs12964689	NPC1(B,G,M,Q); C18orf8(N,Q)	18:21116997-21116998	NPC1	5x10^-4
rs1788826	rs1788826	NPC1(B,G,M,Q); C18orf8(N,Q)	18:21154023-21154024	NPC1	5x10^-4
rs893543	rs3957285		19:1891991-1891992	ABHD17A	5x10^-4
rs893542	rs3957285		19:1891991-1891992	ABHD17A	5x10^-4
rs11671347	rs3957285		19:1891991-1891992	ABHD17A	5x10^-4
rs4808845	rs7258722	GDF15(B); PGPEP1(Q,N)	19:18808914-18808915	CRLF1,TMEM59L,CRTC1,KLHL26	5x10^-4
rs4808844	rs7258722	GDF15(B); PGPEP1(Q,N)	19:18808914-18808915	CRLF1,TMEM59L,CRTC1,KLHL26	5x10^-4
rs11672660	rs11672660	QPCTL(N); GIPR(B,M)	19:46180183-46180184	GIPR	5x10^-7
rs34783010	rs11672660	QPCTL(N); GIPR(B,M)	19:46180183-46180184	GIPR	5x10^-7
rs466477	rs309182	ZC3H4(D,N,Q)	19:47662715-47662716	MIR3191,hsa-mir-3191,BBC3	5x10^-4
rs6001834	rs4820408		22:40604944-40604945	TNRC6B,RP3-496C20.1	5x10^-4
rs4820409	rs12628051		22:40654275-40654276	TNRC6B	5x10^-4

## Sheet: BMI 2015-2018
SNP ID	2018 Sentinel SNP	Locus Name (If assigned in 2015)	Location of Sentinel	Interacting Gene Name	Lowest Threshold Found
rs2748967	rs12044597		1:1708800-1708801	TCONS_l2_00000982	5x10^-6
rs2803295	rs12044597		1:1708800-1708801	TCONS_l2_00000982	5x10^-6
rs2803340	rs2803316		1:1865297-1865298	TCONS_l2_00000982	5x10^-6
rs2803341	rs2803316		1:1865297-1865298	TCONS_l2_00000982	5x10^-6
rs55825112	rs12758705		1:1873624-1873625	TCONS_l2_00000982	5x10^-4
rs6424062	rs4648360		1:2723344-2723345	TCONS_00001923	5x10^-5
rs1884352	rs11121210		1:8708528-8708529	RERE,RP5-1115A15.1	5x10^-5
rs2016084	rs11121210		1:8708528-8708529	RERE,RP5-1115A15.1	5x10^-5
rs1884429	rs2791653		1:11129847-11129848	SRM	5x10^-5
rs12041740	rs2791653		1:11129847-11129848	ANGPTL7,MTOR-AS1	5x10^-5
rs11581010	rs10779751		1:11284335-11284336	MTOR-AS1,ANGPTL7	5x10^-5
rs10864490	rs10779751		1:11284335-11284336	ANGPTL7,MTOR-AS1	5x10^-5
rs6700863	rs6692586		1:23299905-23299906	HTR1D	5x10^-4
rs309535	rs6692586		1:23299905-23299906	HTR1D	5x10^-4
rs6689953	rs6692586		1:23299905-23299906	HTR1D	5x10^-4
rs6692248	rs6692586		1:23299905-23299906	HTR1D	5x10^-4
rs7544129	rs3845520		1:23301942-23301943	HTR1D	5x10^-4
rs10799790	rs3845520		1:23301942-23301943	HTR1D	5x10^-4
rs7529064	rs12032291		1:32129040-32129041	HCRTR1	5x10^-5
rs3014216	rs3014238		1:46090213-46090214	PRDX1,HECTD3,UROD,TOE1,MUTYH,CCDC163P,MMACHC	5x10^-5
rs946529	rs2275426		1:46487551-46487552	LURAP1,POMGNT1,TSPAN1,PIK3R3	5x10^-6
rs4134386	rs2275426		1:46487551-46487552	GPBP1L1,TMEM69	5x10^-6
rs4539075	rs1707322		1:46505146-46505147	PIK3R3	5x10^-5
rs7519181	rs1707322		1:46505146-46505147	TSPAN1,GPBP1L1,TMEM69	5x10^-5
rs946527	rs1707322		1:46505146-46505147	LURAP1,POMGNT1,TSPAN1,PIK3R3	5x10^-5
rs7532204	rs1707322		1:46505146-46505147	LURAP1,POMGNT1,TSPAN1,PIK3R3,GPBP1L1,TMEM69	5x10^-5
rs3922887	rs1707322		1:46505146-46505147	POMGNT1,TSPAN1	5x10^-5
rs946528	rs1707322		1:46505146-46505147	LURAP1,POMGNT1,TSPAN1,PIK3R3	5x10^-5
rs925524	rs1707322		1:46505146-46505147	TSPAN1,PIK3R3,LURAP1,POMGNT1	5x10^-5
rs4134387	rs1707322		1:46505146-46505147	GPBP1L1,TMEM69	5x10^-5
rs12729914	rs12049202	FUBP1(N); USP33(D)	1:77967522-77967523	TCONS_00000997,PIGK,TCONS_00000998	5x10^-6
rs4971006	rs15740		1:151040434-151040435	SCNM1,TNFAIP8L2	5x10^-4
rs4971005	rs15740		1:151040434-151040435	SCNM1,TNFAIP8L2	5x10^-4
rs4971002	rs15740		1:151040434-151040435	CDC42SE1,GABPB2,SCNM1,TNFAIP8L2	5x10^-4
rs4971003	rs15740		1:151040434-151040435	CDC42SE1,GABPB2,SCNM1,TNFAIP8L2	5x10^-4
rs10788800	rs4357530		1:151103152-151103153	SCNM1,TNFAIP8L2	5x10^-6
rs11264483	rs4414033		1:156406852-156406853	TCONS_l2_00001558,RP11-98G7.1,TCONS_l2_00001557	5x10^-4
rs1925950	rs12136856		1:156473113-156473114	MEF2D,TCONS_00001172,TCONS_00002182,IQGAP3,TCONS_00001690,RP11-284F21.8,GPATCH4,TCONS_l2_00001558,RP11-98G7.1,TCONS_l2_00001557	5x10^-4
rs2274319	rs12136856		1:156473113-156473114	MEF2D,TCONS_00001172,TCONS_00002182,IQGAP3,TCONS_00001690,RP11-284F21.8,GPATCH4,TCONS_l2_00001558,RP11-98G7.1,TCONS_l2_00001557	5x10^-4
rs12038396	rs12136856		1:156473113-156473114	MEF2D,IQGAP3,TCONS_l2_00001558,RP11-98G7.1,TCONS_l2_00001557,TCONS_00001172,TCONS_00002182	5x10^-4
rs3818463	rs12136856		1:156473113-156473114	GPATCH4,MEF2D,IQGAP3,TCONS_l2_00001558,RP11-98G7.1,TCONS_l2_00001557	5x10^-4
rs2274320	rs12136856		1:156473113-156473114	GPATCH4,MEF2D,IQGAP3,TCONS_l2_00001558,RP11-98G7.1,TCONS_l2_00001557	5x10^-4
rs2274317	rs12136856		1:156473113-156473114	IQGAP3,MEF2D,GPATCH4,RP11-98G7.1,TCONS_l2_00001557,TCONS_l2_00001558	5x10^-4
rs10803155	rs946824		1:243684018-243684019	AKT3	5x10^-4
rs2867137	rs6715346	TMEM18(N)	2:707254-707255	TCONS_00002796	5x10^-4
rs1631026	rs12468863	KCNK3(D,N)	2:26940293-26940294	AC015977.6,CIB4	5x10^-6
rs1731260	rs12468863	KCNK3(D,N)	2:26940293-26940294	AC015977.6,CIB4	5x10^-6
rs4665897	rs12468863	KCNK3(D,N)	2:26940293-26940294	AC015977.6,CIB4	5x10^-6
rs1731259	rs12468863	KCNK3(D,N)	2:26940293-26940294	AC015977.6,CIB4	5x10^-6
rs1627854	rs12468863	KCNK3(D,N)	2:26940293-26940294	AC015977.6,CIB4	5x10^-6
rs67895037	rs17399334	LINC01122(N)	2:58690294-58690295	AC007092.1	5x10^-4
rs11677847	rs11684690		2:208230090-208230091	KLF7	5x10^-4
rs72951700	rs11684690		2:208230090-208230091	KLF7	5x10^-4
rs11689163	rs11684690		2:208230090-208230091	KLF7	5x10^-4
rs11694560	rs17203016		2:208255517-208255518	KLF7	5x10^-7
rs11692026	rs17203016		2:208255517-208255518	KLF7	5x10^-7
rs72966483	rs11692326		2:208263278-208263279	KLF7	5x10^-7
rs964622	rs10172070		2:208307760-208307761	KLF7,TCONS_00004565,AC007879.5,TCONS_00005327,TCONS_00005325	5x10^-4
rs964621	rs10172070		2:208307760-208307761	KLF7,TCONS_00004565,AC007879.5,TCONS_00005327,TCONS_00005325	5x10^-4
rs4672891	rs921968		2:219272293-219272294	TMBIM1	5x10^-5
rs6436122	rs17608593		2:219890662-219890663	FAM134A,CNPPD1,ZFAND2B,MIR153-1,PTPRN,STK16,GLB1L,NHEJ1	5x10^-4
rs7588654	rs17608593		2:219890662-219890663	MIR3131,IHH,CRYBA2,CCDC108,NHEJ1	5x10^-4
rs11889536	rs2271593		2:220168606-220168607	NHEJ1,FAM134A,CNPPD1	5x10^-4
rs4684848	rs7649970		3:12392271-12392272	PPARG	5x10^-7
rs2252833	rs11713193		3:49924423-49924424	TCONS_00006508,MIR5193,FAM212A,UBA7	5x10^-6
rs3774758	rs11713193		3:49924423-49924424	TCONS_00006508,MIR5193,FAM212A,UBA7,TRAIP	5x10^-6
rs6446187	rs11713193		3:49924423-49924424	TRAIP	5x10^-6
rs2624846	rs7635601		3:50044005-50044006	RBM5	5x10^-4
rs11919418	rs2236941		3:50247823-50247824	SLC38A3,TCONS_00006510,SEMA3B-AS1,SEMA3B,GNAI2	5x10^-5
rs13064381	rs2236941		3:50247823-50247824	SLC38A3,TCONS_00006510,SEMA3B-AS1,SEMA3B,GNAI2	5x10^-5
rs9865532	rs6787805		3:51204787-51204788	MAPKAPK3	5x10^-4
rs9853056	rs1010554		3:52542918-52542919	STAB1	5x10^-4
rs9856990	rs6551278		3:88199297-88199298	EPHA3	5x10^-4
rs6795280	rs162070		3:107835447-107835448	TCONS_00006148	5x10^-4
rs9881400	rs6786582		3:135898983-135898984	MSL2	5x10^-6
rs4680344	rs6805114		3:156897571-156897572	CCNL1	5x10^-4
rs9289979	rs6805114		3:156897571-156897572	VEPH1	5x10^-4
rs35217153	rs6805114		3:156897571-156897572	PTX3,VEPH1,TIPARP,TIPARP-AS1,CCNL1	5x10^-4
rs5398	rs8192675		3:170724882-170724883	SLC2A2	5x10^-4
rs60329099	rs4677812		3:194863793-194863794	AC090505.6,LSG1	5x10^-5
rs58434965	rs2279632		3:194869284-194869285	TCONS_l2_00019078,TCONS_l2_00019079,AC090505.6,TCONS_00007330,AC090505.4	5x10^-5
rs62285259	rs4677666		3:194987568-194987569	AC091633.3,PPP1R2,LSG1	5x10^-5
rs4697571	rs10008104		4:25444761-25444762	SMIM20,SLC34A2,SEL1L3,TCONS_00007730	5x10^-4
rs6811246	rs6853752		4:38592439-38592440	TCONS_l2_00021111,TCONS_l2_00021108,TCONS_l2_00021110,TCONS_l2_00021109	5x10^-4
rs337634	rs6827414		4:38650463-38650464	TCONS_l2_00021111,TCONS_l2_00021108,TCONS_l2_00021110,TCONS_l2_00021109,RP11-83C7.1	5x10^-5
rs13132853	rs6827414		4:38650463-38650464	TCONS_00008776,TCONS_00008465,TCONS_00008044,TCONS_00008045,RP11-600L4.1	5x10^-5
rs34089598	rs4833079		4:38654680-38654681	TCONS_00008776,TCONS_00008465,TCONS_00008044,TCONS_00008045,RP11-600L4.1	5x10^-5
rs3209570	rs1000096		4:38692834-38692835	TBC1D1	5x10^-4
rs172817	rs6829208		4:52728639-52728640	DCUN1D4	5x10^-4
rs4698876	rs223489	SLC39A8(M,N,Q)	4:103680983-103680984	SLC39A8,RP11-499E18.1,TCONS_l2_00021222,TCONS_l2_00021225,UBE2D3,RP11-10L12.4	5x10^-4
rs4698875	rs223489	SLC39A8(M,N,Q)	4:103680983-103680984	SLC39A8,RP11-499E18.1,TCONS_l2_00021222,TCONS_l2_00021225,UBE2D3,RP11-10L12.4	5x10^-4
rs115779479	rs13159555		5:86131059-86131060	CTC-493L21.2	5x10^-4
rs152229	rs7444298		5:87730026-87730027	LINC00461	5x10^-4
rs2107675	rs7716275		5:137631072-137631073	KDM3B,RP11-256P1.1	5x10^-4
rs11567957	rs7716275		5:137631072-137631073	FAM53C	5x10^-4
rs55946741	rs17695092		5:173337852-173337853	BOD1	5x10^-4
rs17695555	rs17695092		5:173337852-173337853	TCONS_00010560,TCONS_00011088,TCONS_00010559,TCONS_00011092,CTB-43E15.4,TCONS_00011094,TCONS_00011091,TCONS_00010838,TCONS_00011095,TCONS_00010562,TCONS_00011093,TCONS_00010563,BOD1	5x10^-4
rs72812811	rs17695092		5:173337852-173337853	TCONS_00010560,TCONS_00011088,TCONS_00010559,TCONS_00011092,CTB-43E15.4,TCONS_00011094,TCONS_00011091,TCONS_00010838,TCONS_00011095,TCONS_00010562,TCONS_00011093,TCONS_00010563,BOD1	5x10^-4
rs12213792	rs11758031	C6orf106(N); SNRPC(Q)	6:33684357-33684358	GRM4	5x10^-4
rs4713677	rs6904716	C6orf106(N); SNRPC(Q)	6:33741288-33741289	GRM4	5x10^-4
rs6921487	rs2281819	C6orf106(N); SNRPC(Q)	6:33771672-33771673	RP3-468B3.2,TCONS_00012701,LINC01016,TCONS_00011210,TCONS_00011788,TCONS_00012148,LEMD2,TCONS_00012480,TCONS_00012479,GRM4	5x10^-5
rs1887340	rs2281819	C6orf106(N); SNRPC(Q)	6:33771672-33771673	GRM4,MIR1275,IP6K3	5x10^-5
rs73746509	rs2281819	C6orf106(N); SNRPC(Q)	6:33771672-33771673	GRM4,MIR1275,IP6K3	5x10^-5
rs72880511	rs2281819	C6orf106(N); SNRPC(Q)	6:33771672-33771673	GRM4,MIR1275,IP6K3	5x10^-5
rs998584	rs998584		6:43757895-43757896	RP5-1120P11.1,RP5-1120P11.3	5x10^-6
rs3934393	rs10498767		6:46363556-46363557	ENPP4,RP1-8B1.4	5x10^-5
rs17752199	rs2579989	TFAP2B(B,N)	6:51460153-51460154	TFAP2B	5x10^-4
rs17258750	rs13201877		6:137675540-137675541	TCONS_00011961	5x10^-7
rs2313453	rs486359		6:160774440-160774441	SLC22A2	5x10^-6
rs2136676	rs486359		6:160774440-160774441	SLC22A2	5x10^-6
rs215607	rs7779181		7:32345282-32345283	PDE1C	5x10^-5
rs740158	rs740158	PMS2L11(N)	7:77055835-77055836	RP5-899E9.1,GSAP	5x10^-5
rs740157	rs740157	PMS2L11(N)	7:77055884-77055885	RP5-899E9.1,GSAP,PTPN12	5x10^-5
rs330094	rs11774381		8:9183338-9183339	TCONS_00014605,TCONS_00014482,RP11-10A14.5,TCONS_00014607,TCONS_00014604,RP11-10A14.7,TCONS_00014928,TCONS_00014927,TCONS_00015406	5x10^-5
rs17149279	rs1461730		8:9187141-9187142	TCONS_00014600,PPP1R3B,TCONS_00015212,RP11-10A14.4,TCONS_00014599	5x10^-6
rs1461728	rs2199403		8:9200786-9200787	TCONS_00014600,PPP1R3B,TCONS_00015212,RP11-10A14.4,TCONS_00014599	5x10^-4
rs1986972	rs13254942		8:10257677-10257678	LINC00599	5x10^-4
rs17441605	rs13294206		9:92197275-92197276	TCONS_00016645	5x10^-4
rs4744275	rs7045925		9:96475305-96475306	MIR4291,RP11-53B5.1	5x10^-4
rs2398869	rs4744275		9:96482632-96482633	MIR4291,RP11-53B5.1	5x10^-4
rs10118498	rs10818938		9:127049236-127049237	NEK6	5x10^-4
rs79027662	rs7871866		9:131027981-131027982	SWI5,GOLGA2	5x10^-4
rs1468648	rs7850697		9:131095111-131095112	SLC27A4,TMSB4XP4	5x10^-5
rs2240948	rs2286814		9:131133982-131133983	URM1	5x10^-5
rs7859557	rs2286814		9:131133982-131133983	URM1	5x10^-5
rs12098288	rs876670	HIF1AN(N)	10:102571559-102571560	HIF1AN	5x10^-4
rs12762934	rs11596235	NT5C2(N); CYP17A1(B); SFXN2(Q)	10:104391033-104391034	SUFU,ACTR1A	5x10^-5
rs11591571	rs11596235	NT5C2(N); CYP17A1(B); SFXN2(Q)	10:104391033-104391034	ACTR1A,SUFU	5x10^-5
rs11598549	rs12771627		10:126691179-126691180	TCONS_00019043,TCONS_00019045,RP11-383C5.4,TCONS_00018630,TCONS_00018629,TCONS_00018632	5x10^-6
rs3781409	rs7086797		10:126711690-126711691	CTBP2	5x10^-4
rs10444192	rs7086797		10:126711690-126711691	CTBP2	5x10^-4
rs6560686	rs902627		10:134018000-134018001	LRRC27,STK32C	5x10^-4
rs1002226	rs10832778		11:17394072-17394073	ABCC8	5x10^-6
rs4755323	rs11038440		11:45419112-45419113	CHST1,CTD-2210P24.4	5x10^-5
rs970179	rs11038440		11:45419112-45419113	CHST1,CTD-2210P24.4	5x10^-5
rs17151664	rs1943477		11:56973792-56973793	APLNR	5x10^-4
rs518053	rs506338		11:64440919-64440920	NRXN2,SLC22A11,AP003774.4,SF1,AP001462.6,TCONS_00019144	5x10^-5
rs519090	rs506338		11:64440919-64440920	NRXN2,SLC22A11,AP003774.4,SF1,AP001462.6,TCONS_00019144	5x10^-5
rs3825016	rs506338		11:64440919-64440920	SLC22A11,SLC22A12	5x10^-5
rs10897518	rs506338		11:64440919-64440920	SLC22A11,SLC22A12	5x10^-5
rs537246	rs506338		11:64440919-64440920	SLC22A11,SLC22A12	5x10^-5
rs12802649	rs506338		11:64440919-64440920	SLC22A11,SLC22A12	5x10^-5
rs10792441	rs506338		11:64440919-64440920	SLC22A11,SLC22A12	5x10^-5
rs559946	rs506338		11:64440919-64440920	SLC22A11,SLC22A12	5x10^-5
rs11605729	rs11604051		11:69275864-69275865	CCND1,TCONS_00019368,TCONS_00019369,TCONS_00019370	5x10^-4
rs1201515	rs1789165		11:69481968-69481969	FADD	5x10^-5
rs869202	rs7117238		11:78040258-78040259	NARS2	5x10^-4
rs1793631	rs11533200		11:131955593-131955594	NTM	5x10^-4
rs12222235	rs11222940		11:131985720-131985721	NTM	5x10^-4
rs11168838	rs10875910	BCDIN3D(N); FAIM2(D)	12:49402392-49402393	RP11-386G11.10,TUBA1B	5x10^-5
rs422022	rs417644	BCDIN3D(N); FAIM2(D)	12:50277425-50277426	RP11-70F11.8,TCONS_00020169,TCONS_00020187,RP11-70F11.11,TCONS_00020781,TCONS_00020419,TCONS_00020420,TCONS_00020421,TCONS_00021310	5x10^-5
rs79387839	rs7295291		12:103701843-103701844	PAH,TCONS_00020899,TCONS_00020542,TCONS_00020541,TCONS_00021396	5x10^-5
rs3782893	rs7397059		12:110310915-110310916	TCHP	5x10^-4
rs28530689	rs7137049	CLIP1(N)	12:122493383-122493384	TCONS_l2_00005951,AC156455.1,TCONS_l2_00005953,TCONS_l2_00005950,TCONS_l2_00005956,TCONS_l2_00005949,TCONS_l2_00005955,TCONS_l2_00005954,TCONS_l2_00005952,IL31	5x10^-4
rs10773037	rs7137049	CLIP1(N)	12:122493383-122493384	WDR66,TCONS_l2_00005951,AC156455.1,TCONS_l2_00005953,TCONS_l2_00005950,TCONS_l2_00005956,TCONS_l2_00005949,TCONS_l2_00005955,TCONS_l2_00005954,TCONS_l2_00005952,MLXIP	5x10^-4
rs28737311	rs7137049	CLIP1(N)	12:122493383-122493384	WDR66,TCONS_l2_00005950,AC156455.1,TCONS_l2_00005956,TCONS_l2_00005952,TCONS_l2_00005949,TCONS_l2_00005954,TCONS_l2_00005951,TCONS_l2_00005953,TCONS_l2_00005955,MLXIP	5x10^-4
rs36158849	rs7137049	CLIP1(N)	12:122493383-122493384	TCONS_l2_00005950,AC156455.1,TCONS_l2_00005956,TCONS_l2_00005952,TCONS_l2_00005949,TCONS_l2_00005954,TCONS_l2_00005951,TCONS_l2_00005953,TCONS_l2_00005955	5x10^-4
rs7299842	rs7137049	CLIP1(N)	12:122493383-122493384	TCONS_l2_00005950,AC156455.1,TCONS_l2_00005956,TCONS_l2_00005952,TCONS_l2_00005949,TCONS_l2_00005954,TCONS_l2_00005951,TCONS_l2_00005953,TCONS_l2_00005955	5x10^-4
rs2280573	rs7137049	CLIP1(N)	12:122493383-122493384	TCONS_l2_00005951,TCONS_l2_00005952,TCONS_l2_00005950,TCONS_l2_00005955,TCONS_l2_00005956,TCONS_l2_00005953,TCONS_l2_00005949,TCONS_l2_00005954,AC156455.1	5x10^-4
rs7959238	rs4319547	CLIP1(N)	12:123079034-123079035	HCAR1	5x10^-6
rs7307277	rs7133378		12:124409501-124409502	EIF2B1,GTF2H3	5x10^-4
rs7978610	rs7133378		12:124409501-124409502	EIF2B1,GTF2H3,RP11-214K3.18,ZNF664,CCDC92,FAM101A	5x10^-4
rs825452	rs10773049		12:124506630-124506631	TCONS_00021242,TCONS_00020963	5x10^-5
rs6575334	rs12888273		14:93951656-93951657	BTBD7,UNC79	5x10^-4
rs8003237	rs3803286		14:103246469-103246470	TCONS_00022889,TRAF3,RP11-661D19.3,AMN	5x10^-4
rs8023164	rs3803286		14:103246469-103246470	TCONS_00022889,TRAF3,RP11-661D19.3,AMN	5x10^-4
rs62008982	rs3803286		14:103246469-103246470	TCONS_00022889,TRAF3,RP11-661D19.3,AMN	5x10^-4
rs11624345	rs3803286		14:103246469-103246470	TCONS_00022889,TRAF3,RP11-661D19.3,AMN	5x10^-4
rs72704741	rs7143963		14:103304424-103304425	TCONS_00022889,TRAF3,RP11-661D19.3	5x10^-7
rs4906272	rs7143963		14:103304424-103304425	TCONS_00022889,TRAF3,RP11-661D19.3,AMN	5x10^-7
rs34503276	rs7143963		14:103304424-103304425	TCONS_00022889,TRAF3,RP11-661D19.3,AMN	5x10^-7
rs1136165	rs2010281		14:103862321-103862322	RP11-600F24.7,TRMT61A	5x10^-7
rs78135660	rs11629783		15:66741386-66741387	SNAPC5,MIR4512	5x10^-4
rs4886932	rs7164558		15:78146381-78146382	RP11-307C19.3	5x10^-4
rs12598706	rs4483850	GPRC5B(C,N); IQCK(Q)	16:20375775-20375776	TCONS_00024814,TCONS_00024342	5x10^-5
rs7201519	rs13332078	ATXN2L(Q); SBK1(Q,D); SULT1A2(Q); TUFM(Q)	16:29850704-29850705	MVP	5x10^-4
rs3815824	rs13332078	ATXN2L(Q); SBK1(Q,D); SULT1A2(Q); TUFM(Q)	16:29850704-29850705	MVP,TAOK2	5x10^-4
rs4420550	rs11649612	ATXN2L(Q); SBK1(Q,D); SULT1A2(Q); TUFM(Q)	16:29946669-29946670	INO80E,HIRIP3,TAOK2,CDIPT-AS1,CDIPT	5x10^-5
rs7204852	rs12596543	ATXN2L(Q); SBK1(Q,D); SULT1A2(Q); TUFM(Q)	16:30029134-30029135	FAM57B	5x10^-5
rs7191849	rs12596543	ATXN2L(Q); SBK1(Q,D); SULT1A2(Q); TUFM(Q)	16:30029134-30029135	TAOK2	5x10^-5
rs12162068	rs9935025		16:68307446-68307447	PRMT7,SLC7A6OS	5x10^-4
rs12102971	rs9935025		16:68307446-68307447	PRMT7,SLC7A6OS	5x10^-4
rs12446197	rs244418		16:69622761-69622762	WWP2	5x10^-5
rs8082647	rs9914578		17:2005135-2005136	SMG6,AL450226.2	5x10^-7
rs11655813	rs7217226		17:2136064-2136065	SMG6,HIC1,AL450226.2,RP11-667K14.5	5x10^-6
rs216172	rs7217226		17:2136064-2136065	SMG6,AL450226.2,RP11-667K14.5	5x10^-6
rs216218	rs7217226		17:2136064-2136065	HIC1,AL450226.2,SMG6	5x10^-6
rs2169357	rs7217226		17:2136064-2136065	SMG6,AL450226.2	5x10^-6
rs1563966	rs7217226		17:2136064-2136065	SMG6,AL450226.2	5x10^-6
rs7217687	rs7217226		17:2136064-2136065	SMG6,RP11-667K14.5	5x10^-6
rs11651451	rs7217226		17:2136064-2136065	SMG6,RP11-667K14.5	5x10^-6
rs10852932	rs7217226		17:2136064-2136065	SMG6,RP11-667K14.5	5x10^-6
rs3785542	rs4986003		17:21177798-21177799	DHRS7B	5x10^-4
rs2001651	rs4986003		17:21177798-21177799	DHRS7B	5x10^-4
rs9906072	rs4986044		17:21261559-21261560	KCNJ12	5x10^-7
rs8074249	rs4796243		17:35057882-35057883	LHX1,TCONS_00026057,RP11-445F12.1,AATF,TCONS_00025369	5x10^-4
rs8080757	rs4796243		17:35057882-35057883	LHX1,TCONS_00026057,RP11-445F12.1,AATF,TCONS_00025369	5x10^-4
rs55692847	rs17599948		17:41353409-41353410	DHX8	5x10^-4
rs7210671	rs11079810		17:46227845-46227846	HOXB3,HOXB7,HOXB6	5x10^-6
rs8073220	rs11079810		17:46227845-46227846	MIR152,COPZ2	5x10^-6
rs16951519	rs16954324		17:46324583-46324584	MIR152,COPZ2,TCONS_00025686,TCONS_00025688,TCONS_00025687,NFE2L1,RP5-890E16.2	5x10^-6
rs2240121	rs16954324		17:46324583-46324584	MIR152,COPZ2,TCONS_00025686,TCONS_00025688,TCONS_00025687,NFE2L1,RP5-890E16.2	5x10^-6
rs2326013	rs12450225		17:46592412-46592413	HOXB3	5x10^-5
rs28463311	rs8075273		17:61728880-61728881	PSMC5,FTSJ3	5x10^-6
rs11874246	rs954018		18:42598462-42598463	RP11-456K23.1,SETBP1,TCONS_00026507	5x10^-4
rs948706	rs7236870		18:42601018-42601019	RP11-456K23.1,SETBP1,TCONS_00026507	5x10^-4
rs12611202	rs4807152		19:1851083-1851084	ABHD17A	5x10^-4
rs12610131	rs4807152		19:1851083-1851084	ABHD17A	5x10^-4
rs893543	rs3957285		19:1891991-1891992	ABHD17A	5x10^-4
rs893542	rs3957285		19:1891991-1891992	ABHD17A	5x10^-4
rs11671347	rs3957285		19:1891991-1891992	ABHD17A	5x10^-4
rs72976987	rs895330		19:4060706-4060707	PIAS4	5x10^-4
rs4808844	rs7258722	GDF15(B); PGPEP1(Q,N)	19:18808914-18808915	CRTC1,CRLF1,TMEM59L,KLHL26	5x10^-5
rs4808845	rs7258722	GDF15(B); PGPEP1(Q,N)	19:18808914-18808915	CRTC1,CRLF1,TMEM59L,KLHL26	5x10^-5
rs4808958	rs6511027	GDF15(B); PGPEP1(Q,N)	19:19391850-19391851	MIR640,SUGP1,MAU2	5x10^-4
rs8105642	rs6511027	GDF15(B); PGPEP1(Q,N)	19:19391850-19391851	MIR640	5x10^-4
rs56280531	rs6511027	GDF15(B); PGPEP1(Q,N)	19:19391850-19391851	MIR640	5x10^-4
rs1529745	rs6511027	GDF15(B); PGPEP1(Q,N)	19:19391850-19391851	MIR640	5x10^-4
rs11555053	rs6511027	GDF15(B); PGPEP1(Q,N)	19:19391850-19391851	SUGP1,MAU2	5x10^-4
rs2010506	rs6511027	GDF15(B); PGPEP1(Q,N)	19:19391850-19391851	SUGP1,MAU2	5x10^-4
rs1560687	rs6511027	GDF15(B); PGPEP1(Q,N)	19:19391850-19391851	MIR640	5x10^-4
rs76790018	rs6511027	GDF15(B); PGPEP1(Q,N)	19:19391850-19391851	GMIP	5x10^-4
rs113527843	rs6511027	GDF15(B); PGPEP1(Q,N)	19:19391850-19391851	ZNF101,PBX4	5x10^-4
rs17751061	rs6511027	GDF15(B); PGPEP1(Q,N)	19:19391850-19391851	SUGP1,MAU2	5x10^-4
rs8100927	rs6511027	GDF15(B); PGPEP1(Q,N)	19:19391850-19391851	PBX4	5x10^-4
rs1469712	rs2965185	GDF15(B); PGPEP1(Q,N)	19:19525791-19525792	MIR640	5x10^-5
rs10422819	rs2965185	GDF15(B); PGPEP1(Q,N)	19:19525791-19525792	PBX4	5x10^-5
rs4911157	rs6058089		20:33194256-33194257	TP53INP2	5x10^-4
rs910869	rs2236270		20:33523154-33523155	MAP1LC3A	5x10^-4
rs3746756	rs6011478		20:61556770-61556771	DIDO1,GID8,SLC17A9	5x10^-4
rs13051086	rs2222994		21:40303427-40303428	TCONS_00028756,TCONS_00028929,TCONS_00028784,AF064858.6,TCONS_l2_00017240	5x10^-4
rs2410069	rs2222994		21:40303427-40303428	TCONS_00028756,TCONS_00028929,TCONS_00028784,AF064858.6,TCONS_l2_00017240	5x10^-4
rs373687	rs2838771		21:46501575-46501576	C21orf67,FAM207A	5x10^-4
rs372519	rs427943		21:46570895-46570896	FAM207A,C21orf67	5x10^-7
rs403694	rs427943		21:46570895-46570896	FAM207A,C21orf67	5x10^-7
rs6001834	rs4820408		22:40604944-40604945	TNRC6B,RP3-496C20.1	5x10^-6
rs4820409	rs12628051		22:40654275-40654276	TNRC6B	5x10^-4
rs28360521	rs5751232		22:42564303-42564304	NDUFA6-AS1,NDUFA6,RP1-257I20.14	5x10^-4
rs714002	rs5751232		22:42564303-42564304	TCF20,Z83851.1,TCONS_00029350	5x10^-4

## Sheet: WHRadjBMI 2010-2015
SNP ID	2018 Sentinel SNP	Locus Name (If assigned in 2015)	Location of Sentinel	Interacting Gene Name	Lowest Threshold Found
rs6427242	rs10919388	GORAB	1:170372502-170372503	GORAB,RP11-576I22.2	5x10^-5
rs6427242	rs10919388	GORAB	1:170372502-170372503	GORAB,RP11-576I22.2	5x10^-5
rs929529	rs13076508	PBRM1	3:52407804-52407805	NT5DC2,SMIM4,STAB1	5x10^-7
rs929528	rs13076508	PBRM1	3:52407804-52407805	NT5DC2,SMIM4,STAB1	5x10^-7
rs4312651	rs13076508	PBRM1	3:52407804-52407805	NT5DC2,SMIM4,STAB1	5x10^-7
rs728408	rs13076508	PBRM1	3:52407804-52407805	STAB1,NISCH,TNNC1	5x10^-7
rs34827613	rs13076508	PBRM1	3:52407804-52407805	GLYCTK,WDR82	5x10^-7
rs9853056	rs1108842	PBRM1	3:52720079-52720080	STAB1	5x10^-6
rs77572134	rs13080929	PBRM1	3:52885111-52885112	TCONS_00007175,TCONS_00006513	5x10^-5
rs9854955	rs17451107	LEKR1	3:156797608-156797609	TCONS_l2_00019596,TCONS_00006285,LINC00886,TIPARP-AS1,TIPARP,LEKR1,SSR3	5x10^-4
rs13322435	rs17451107	LEKR1	3:156797608-156797609	TCONS_l2_00019596,TCONS_00006285,LINC00886,TIPARP-AS1,TIPARP,LEKR1,SSR3	5x10^-4
rs9817452	rs17451107	LEKR1	3:156797608-156797609	TCONS_l2_00019596,TCONS_00006285,LINC00886,TIPARP-AS1,TIPARP,LEKR1,SSR3	5x10^-4
rs56406311	rs17451107	LEKR1	3:156797608-156797609	TCONS_l2_00019596,TCONS_00006285,LINC00886,TIPARP-AS1,TIPARP,LEKR1,SSR3	5x10^-4
rs10012624	rs9991328	FAM13A	4:89713120-89713121	FAM13A,RP11-84C13.1,TIGD2	5x10^-5
rs10012528	rs9991328	FAM13A	4:89713120-89713121	FAM13A,RP11-84C13.1,TIGD2	5x10^-5
rs392794	rs459193	MAP3K1	5:55806750-55806751	TCONS_00010343,AC022431.3,TCONS_00010344,TCONS_00010345,CTC-236F12.4	5x10^-5
rs465002	rs459193	MAP3K1	5:55806750-55806751	TCONS_00010343,AC022431.3,TCONS_00010344,TCONS_00010345,CTC-236F12.4	5x10^-5
rs157507	rs455660	MAP3K1	5:55816887-55816888	TCONS_00010343,AC022431.3,TCONS_00010344,TCONS_00010345,CTC-236F12.4	5x10^-4
rs9687833	rs3936510	MAP3K1	5:55860865-55860866	CTC-236F12.4,MAP3K1,TCONS_00010343,AC022431.3,TCONS_00010344,TCONS_00010345	5x10^-5
rs9687832	rs3936510	MAP3K1	5:55860865-55860866	CTC-236F12.4,MAP3K1,TCONS_00010343,AC022431.3,TCONS_00010344,TCONS_00010345	5x10^-5
rs3936511	rs3936510	MAP3K1	5:55860865-55860866	CTC-236F12.4,MAP3K1,TCONS_00010343,AC022431.3,TCONS_00010344,TCONS_00010345	5x10^-5
rs55946741	rs7705502	CPEB4	5:173320814-173320815	BOD1	5x10^-6
rs17695555	rs7705502	CPEB4	5:173320814-173320815	BOD1,TCONS_00010563,TCONS_00010562,TCONS_00011093,TCONS_00011094,TCONS_00010838,TCONS_00011092,TCONS_00011091,TCONS_00011095,CTB-43E15.4,TCONS_00010559,TCONS_00010560,TCONS_00011088	5x10^-6
rs72812811	rs7705502	CPEB4	5:173320814-173320815	BOD1,TCONS_00010563,TCONS_00010562,TCONS_00011093,TCONS_00011094,TCONS_00010838,TCONS_00011092,TCONS_00011091,TCONS_00011095,CTB-43E15.4,TCONS_00010559,TCONS_00010560,TCONS_00011088	5x10^-6
rs16937647	rs12549058	MSC	8:72492237-72492238	EYA1	5x10^-5
rs894737	rs2071449	HOXC13	12:54428010-54428011	HOXC8,SMUG1,TCONS_00020438,HOXC-AS1,HOXC9,TCONS_00020434	5x10^-5
rs894736	rs2071449	HOXC13	12:54428010-54428011	HOXC8,SMUG1,TCONS_00020438,HOXC-AS1,HOXC9,TCONS_00020434	5x10^-5
rs4759319	rs2071449	HOXC13	12:54428010-54428011	SMUG1,TCONS_00020438	5x10^-5
rs56270790	rs2071449	HOXC13	12:54428010-54428011	SMUG1,TCONS_00020438	5x10^-5
rs10876530	rs2071449	HOXC13	12:54428010-54428011	TCONS_00020438,SMUG1	5x10^-5
rs7307277	rs4765219	CCDC92	12:124440109-124440110	GTF2H3,EIF2B1	5x10^-6
rs7978610	rs4765219	CCDC92	12:124440109-124440110	GTF2H3,EIF2B1,FAM101A,RP11-214K3.18,CCDC92,ZNF664	5x10^-6
rs825452	rs863750	CCDC92	12:124505443-124505444	TCONS_00020963,TCONS_00021242	5x10^-4

## Sheet: WHRadjBMI 2010-2018
SNP ID	2018 Sentinel SNP	Locus Name (If assigned in 2015)	Location of Sentinel	Interacting Gene Name	Lowest Threshold Found
rs12131740	rs2421111	GORAB	1:170071744-170071745	GORAB,RP11-576I22.2	5x10^-6
rs10753805	rs10919388	GORAB	1:170372502-170372503	GORAB,RP11-576I22.2	5x10^-5
rs6427242	rs10919388	GORAB	1:170372502-170372503	GORAB,RP11-576I22.2	5x10^-5
rs13417833	rs9742		2:37869493-37869494	TCONS_00004206,LINC00211,TCONS_00002749	5x10^-4
rs13392288	rs9742		2:37869493-37869494	TCONS_00004206,LINC00211,TCONS_00002749	5x10^-4
rs13417957	rs7735		2:37872507-37872508	TCONS_00004206,LINC00211,TCONS_00002749	5x10^-4
rs67084656	rs13406302		2:37874849-37874850	LINC00211,TCONS_00004206,TCONS_00002749	5x10^-4
rs4316924	rs12465584		2:67847484-67847485	TCONS_00003726,TCONS_00003727,TCONS_00004811,TCONS_00004810,TCONS_00004809	5x10^-4
rs6446196	rs3774628		3:48801839-48801840	SLC25A20,MIR425,NDUFAF3,MIR191,DALRD3	5x10^-4
rs6442130	rs3774628		3:48801839-48801840	IP6K2	5x10^-4
rs11716017	rs2159607	PBRM1	3:52501450-52501451	WDR82,GLYCTK	5x10^-4
rs34261027	rs2159607	PBRM1	3:52501450-52501451	SPCS1,GLT8D1,STAB1	5x10^-4
rs929529	rs2109558	PBRM1	3:52501615-52501616	NT5DC2,SMIM4,STAB1	5x10^-7
rs929528	rs2109558	PBRM1	3:52501615-52501616	NT5DC2,SMIM4,STAB1	5x10^-7
rs4312651	rs2109558	PBRM1	3:52501615-52501616	NT5DC2,SMIM4,STAB1	5x10^-7
rs9853056	rs1108842	PBRM1	3:52720079-52720080	STAB1	5x10^-6
rs2310917	rs1136553	PLXND1	3:129366962-129366963	TMCC1	5x10^-5
rs9854955	rs10049088	LEKR1	3:156797647-156797648	TCONS_l2_00019596,TCONS_00006285,LINC00886,TIPARP-AS1,TIPARP,LEKR1,SSR3	5x10^-4
rs13322435	rs10049088	LEKR1	3:156797647-156797648	TCONS_l2_00019596,TCONS_00006285,LINC00886,TIPARP-AS1,TIPARP,LEKR1,SSR3	5x10^-4
rs9817452	rs10049088	LEKR1	3:156797647-156797648	TCONS_l2_00019596,TCONS_00006285,LINC00886,TIPARP-AS1,TIPARP,LEKR1,SSR3	5x10^-4
rs56406311	rs10049088	LEKR1	3:156797647-156797648	TCONS_l2_00019596,TCONS_00006285,LINC00886,TIPARP-AS1,TIPARP,LEKR1,SSR3	5x10^-4
rs35944082	rs7441808		4:26090374-26090375	RBPJ	5x10^-4
rs10012624	rs2167750	FAM13A	4:89730073-89730074	FAM13A,RP11-84C13.1,TIGD2	5x10^-5
rs10012528	rs2167750	FAM13A	4:89730073-89730074	FAM13A,RP11-84C13.1,TIGD2	5x10^-5
rs1458758	rs307039	SPATA5-FGF2	4:124061368-124061369	TCONS_l2_00021278,TCONS_l2_00021279,CETN4P,TCONS_l2_00021277,TCONS_l2_00021957,BBS12,AC021205.1,FGF2	5x10^-4
rs392794	rs459193	MAP3K1	5:55806750-55806751	TCONS_00010343,AC022431.3,TCONS_00010344,TCONS_00010345	5x10^-5
rs465002	rs459193	MAP3K1	5:55806750-55806751	TCONS_00010343,AC022431.3,TCONS_00010344,TCONS_00010345	5x10^-5
rs157507	rs456867	MAP3K1	5:55811091-55811092	TCONS_00010343,AC022431.3,TCONS_00010344,TCONS_00010345	5x10^-4
rs9687833	rs3936510	MAP3K1	5:55860865-55860866	CTC-236F12.4,MAP3K1,TCONS_00010343,AC022431.3,TCONS_00010344,TCONS_00010345	5x10^-5
rs9687832	rs3936510	MAP3K1	5:55860865-55860866	CTC-236F12.4,MAP3K1,TCONS_00010343,AC022431.3,TCONS_00010344,TCONS_00010345	5x10^-5
rs3936511	rs3936510	MAP3K1	5:55860865-55860866	CTC-236F12.4,MAP3K1,TCONS_00010343,AC022431.3,TCONS_00010344,TCONS_00010345	5x10^-5
rs3936510	rs13173241	MAP3K1	5:55861358-55861359	CTC-236F12.4,MAP3K1,TCONS_00010343,AC022431.3,TCONS_00010344,TCONS_00010345	5x10^-4
rs55946741	rs6861681	CPEB4	5:173362457-173362458	BOD1	5x10^-6
rs17695555	rs6861681	CPEB4	5:173362457-173362458	BOD1,TCONS_00010563,TCONS_00010562,TCONS_00011093,TCONS_00011094,TCONS_00010838,TCONS_00011092,TCONS_00011091,TCONS_00011095,CTB-43E15.4,TCONS_00010559,TCONS_00010560,TCONS_00011088	5x10^-6
rs72812811	rs6861681	CPEB4	5:173362457-173362458	BOD1,TCONS_00010563,TCONS_00010562,TCONS_00011093,TCONS_00011094,TCONS_00010838,TCONS_00011092,TCONS_00011091,TCONS_00011095,CTB-43E15.4,TCONS_00010559,TCONS_00010560,TCONS_00011088	5x10^-6
rs875897	rs875898	SNX10	7:27200904-27200905	HNRNPA2B1,CBX3,SNX10	5x10^-4
rs983184	rs875898	SNX10	7:27200904-27200905	SKAP2,CBX3,HNRNPA2B1	5x10^-4
rs11762730	rs875898	SNX10	7:27200904-27200905	CBX3,HNRNPA2B1,HOXA2,TCONS_l2_00027077,TCONS_l2_00025728,AC004540.5,TCONS_l2_00025729,TCONS_l2_00025727,SKAP2	5x10^-4
rs4729541	rs4727453		7:77292820-77292821	RP5-899E9.1,GSAP	5x10^-4
rs16937647	rs16937664	MSC	8:72480459-72480460	EYA1	5x10^-5
rs7093321	rs4747358		10:5650192-5650193	NET1	5x10^-4
rs11818357	rs4747358		10:5650192-5650193	NET1	5x10^-4
rs12372721	rs10844652		12:33754876-33754877	YARS2	5x10^-4
rs894737	rs2071449	HOXC13	12:54428010-54428011	HOXC8,SMUG1,TCONS_00020438,HOXC-AS1,HOXC9,TCONS_00020434	5x10^-5
rs894736	rs2071449	HOXC13	12:54428010-54428011	HOXC8,SMUG1,TCONS_00020438,HOXC-AS1,HOXC9,TCONS_00020434	5x10^-5
rs7953280	rs4761739		12:94106365-94106366	CRADD,SOCS2,SOCS2-AS1	5x10^-4
rs7307277	rs11057408	CCDC92	12:124464835-124464836	GTF2H3,EIF2B1	5x10^-6
rs7978610	rs7307277	CCDC92	12:124475155-124475156	GTF2H3,EIF2B1	5x10^-6
rs825452	rs863750	CCDC92	12:124505443-124505444	TCONS_00020963,TCONS_00021242	5x10^-4
rs3810817	rs2072151		16:4391039-4391040	TCONS_00024564,TCONS_00024562,TCONS_00024949,TCONS_00024950,RP11-462G12.1	5x10^-4
rs11645519	rs4786493		16:4500121-4500122	HMOX2,NMRAL1	5x10^-4
rs3789038	rs4786493		16:4500121-4500122	HMOX2,NMRAL1	5x10^-4
rs2304634	rs4786493		16:4500121-4500122	HMOX2,NMRAL1	5x10^-4
rs12602879	rs2727061		17:3985831-3985832	ANKFY1	5x10^-4
rs12982300	rs2269882		19:2196782-2196783	AP3D1,DOT1L	5x10^-4
rs34508287	rs12691	CEBPA	19:33791126-33791127	CEBPG	5x10^-4
rs6058193	rs11696967	GDF5	20:33743608-33743609	EDEM2,MMP24-AS1	5x10^-4
rs6058194	rs11696967	GDF5	20:33743608-33743609	PROCR	5x10^-4

## Sheet: WHRadjBMI 2015-2018
SNP ID	2018 Sentinel SNP	Locus Name (If assigned in 2015)	Location of Sentinel	Interacting Gene Name	Lowest Threshold Found
rs3129533	rs807067		1:26197062-26197063	PAFAH2	5x10^-4
rs213624	rs807067		1:26197062-26197063	AL020996.1,MTFR1L,RP1-317E23.3	5x10^-4
rs213623	rs807067		1:26197062-26197063	AL020996.1,MTFR1L,RP1-317E23.3	5x10^-4
rs11893688	rs10495563		2:9662209-9662210	IAH1	5x10^-5
rs72786270	rs17509001		2:24021230-24021231	FAM228B,SF3B14	5x10^-6
rs13417833	rs9742		2:37869493-37869494	LINC00211,TCONS_00004206,TCONS_00002749	5x10^-5
rs13392288	rs9742		2:37869493-37869494	LINC00211,TCONS_00004206,TCONS_00002749	5x10^-5
rs13417957	rs7735		2:37872507-37872508	LINC00211,TCONS_00004206,TCONS_00002749	5x10^-5
rs67084656	rs13406302		2:37874849-37874850	LINC00211,TCONS_00004206,TCONS_00002749	5x10^-6
rs6752762	rs13406302		2:37874849-37874850	LINC00211,TCONS_00004207	5x10^-6
rs28876725	rs11676137		2:37941347-37941348	LINC00211,TCONS_00004206,TCONS_00002749	5x10^-5
rs76450091	rs6725688		2:43846552-43846553	TCONS_00003659,TCONS_00003658,AC098824.6,TCONS_l2_00014533,TCONS_00004223,TCONS_00004224,AC093609.1	5x10^-4
rs10186307	rs6725688		2:43846552-43846553	DYNC2LI1	5x10^-4
rs4851209	rs3792142		2:100057207-100057208	TXNDC9,EIF5B	5x10^-5
rs4851208	rs3792142		2:100057207-100057208	TXNDC9,EIF5B	5x10^-5
rs9874278	rs4128529		3:43435542-43435543	MIR138-1	5x10^-4
rs17075814	rs4128529		3:43435542-43435543	MIR138-1	5x10^-4
rs2290546	rs9855938		3:46957297-46957298	TCONS_00006009,TCONS_00006010,SETD2,KIF9-AS1,CCDC12,NBEAL2	5x10^-5
rs11705936	rs9855938		3:46957297-46957298	NBEAL2,CCDC12	5x10^-5
rs7628747	rs11917361		3:47070496-47070497	CCDC12,NBEAL2	5x10^-5
rs6808742	rs11917361		3:47070496-47070497	CCDC12,NBEAL2	5x10^-5
rs2061197	rs11917361		3:47070496-47070497	CCDC12,NBEAL2	5x10^-5
rs12630534	rs11917361		3:47070496-47070497	CCDC12,NBEAL2	5x10^-5
rs12487736	rs6791842		3:47279809-47279810	SCAP	5x10^-4
rs6442130	rs4858798		3:48727111-48727112	IP6K2	5x10^-5
rs6446196	rs4858798		3:48727111-48727112	SLC25A20,DALRD3,MIR191,NDUFAF3,MIR425	5x10^-5
rs6414613	rs4858798		3:48727111-48727112	NDUFAF3,MIR191,MIR425,DALRD3	5x10^-5
rs56049603	rs6798112		3:49093376-49093377	BSN-AS2,BSN,TCONS_00005458	5x10^-4
rs4955440	rs13096474		3:49443080-49443081	TCTA,RHOA,NICN1	5x10^-4
rs1982861	rs13096474		3:49443080-49443081	TCONS_00005458,BSN-AS2,BSN,APEH	5x10^-4
rs4955443	rs13096474		3:49443080-49443081	CCDC36	5x10^-4
rs78640750	rs7651129		3:66474953-66474954	TCONS_00006527	5x10^-4
rs77817750	rs7651129		3:66474953-66474954	TCONS_00006527	5x10^-4
rs35944082	rs10517086		4:26085510-26085511	RBPJ	5x10^-4
rs1801260	rs861029	NMU	4:56245636-56245637	RP11-528I4.2,CLOCK	5x10^-4
rs13129021	rs7684567		4:122577769-122577770	QRFPR	5x10^-4
rs1842383	rs7684567		4:122577769-122577770	QRFPR	5x10^-4
rs13148862	rs6845202		4:122609866-122609867	EXOSC9	5x10^-5
rs13121588	rs6845202		4:122609866-122609867	EXOSC9	5x10^-5
rs1348716	rs13186194		5:60795484-60795485	TCONS_00010353,TCONS_00009279	5x10^-4
rs9293709	rs4704389		5:76446102-76446103	WDR41	5x10^-5
rs7707470	rs17145265	TNFAIP8-HSD17B4	5:118698997-118698998	TNFAIP8	5x10^-5
rs73239280	rs17145294	TNFAIP8-HSD17B4	5:118701432-118701433	TNFAIP8	5x10^-5
rs3088225	rs11747001		5:132412298-132412299	HSPA4	5x10^-4
rs28684504	rs6880798	FGFR4	5:176704456-176704457	PRR7,PRR7-AS1	5x10^-4
rs17078781	rs6880798	FGFR4	5:176704456-176704457	PRR7,PRR7-AS1	5x10^-4
rs6900796	rs9398794	RSPO3	6:126380404-126380405	CENPW	5x10^-5
rs10255707	rs903889		7:45964994-45964995	AC004869.2,AC004869.3,TCONS_00013797	5x10^-4
rs2854746	rs11977526		7:46008109-46008110	TCONS_00013163	5x10^-4
rs1051921	rs6976930		7:72885809-72885810	CLDN4	5x10^-5
rs4729541	rs4727453		7:77292820-77292821	GSAP,RP5-899E9.1	5x10^-5
rs3823752	rs1144		7:104756354-104756355	TCONS_00013917,LINC01004,KMT2E-AS1,KMT2E,TCONS_00014390,TCONS_00013916	5x10^-5
rs2192932	rs1144		7:104756354-104756355	KMT2E-AS1,TCONS_00013917,KMT2E,TCONS_00014390,LINC01004,TCONS_00013916	5x10^-5
rs1010340	rs12155351		7:104943301-104943302	SRPK2	5x10^-4
rs6949073	rs12155351		7:104943301-104943302	SRPK2	5x10^-4
rs2299309	rs12155351		7:104943301-104943302	SRPK2	5x10^-4
rs75305582	rs11770285		7:107616010-107616011	LAMB4	5x10^-6
rs1547959	rs7795061		7:120933044-120933045	CPED1	5x10^-4
rs1547960	rs7795061		7:120933044-120933045	CPED1	5x10^-4
rs34653170	rs4841436		8:10594473-10594474	hsa-mir-1322	5x10^-4
rs11250078	rs4841436		8:10594473-10594474	hsa-mir-1322	5x10^-4
rs891556	rs4841436		8:10594473-10594474	hsa-mir-1322	5x10^-4
rs11989744	rs17782264	NKX2-6	8:23570488-23570489	CTC-756D1.2,ENTPD4,TCONS_00014653	5x10^-5
rs13249197	rs7830933	NKX2-6	8:23603323-23603324	CTC-756D1.2,ENTPD4,TCONS_00014653	5x10^-7
rs57220043	rs9644033	NKX2-6	8:23610638-23610639	CTC-756D1.2,TCONS_00014653,ENTPD4	5x10^-7
rs10955969	rs7003062		8:121358526-121358527	COL14A1	5x10^-4
rs7821701	rs7003062		8:121358526-121358527	COL14A1	5x10^-4
rs62525608	rs10100533		8:135706218-135706219	TCONS_00015371,TCONS_00014866,AC083843.2	5x10^-5
rs6479426	rs912261		9:95442032-95442033	CENPP,NOL8,ECM2,IARS,SNORA84	5x10^-4
rs3824734	rs11186914		10:94062630-94062631	CPEB3	5x10^-4
rs1223590	rs1223583		10:95756499-95756500	PLCE1	5x10^-4
rs1223588	rs1223583		10:95756499-95756500	PLCE1	5x10^-4
rs12762934	rs11596235	SFXN2	10:104391033-104391034	ACTR1A,SUFU	5x10^-4
rs11591571	rs11596235	SFXN2	10:104391033-104391034	ACTR1A,SUFU	5x10^-4
rs10769953	rs3763920		11:8808586-8808587	RP11-318C2.1,RPL27A	5x10^-4
rs2173999	rs3763920		11:8808586-8808587	RP11-318C2.1,RPL27A	5x10^-4
rs2509967	rs2509961		11:62310908-62310909	AHNAK,SCGB1A1,EEF1G,TCONS_00019651	5x10^-5
rs2849030	rs2509967		11:62312785-62312786	TUT1,MIR3654	5x10^-5
rs61296092	rs2509967		11:62312785-62312786	AHNAK,RP11-864I4.4,SCGB1A1,EEF1G	5x10^-5
rs2509961	rs2509967		11:62312785-62312786	AHNAK,RP11-864I4.4,EEF1G	5x10^-5
rs2075660	rs3741378		11:65408936-65408937	MIR4690,SIPA1	5x10^-4
rs28599796	rs6606672		11:69148571-69148572	TCONS_00019684,CCND1,TCONS_00019368	5x10^-6
rs12808959	rs6606672		11:69148571-69148572	TCONS_00019684,CCND1,TCONS_00019368	5x10^-6
rs28411200	rs6606672		11:69148571-69148572	TCONS_00019684,CCND1,TCONS_00019368	5x10^-6
rs11605729	rs11604051		11:69275864-69275865	CCND1,TCONS_00019370,TCONS_00019369,TCONS_00019368	5x10^-4
rs4252591	rs6589259		11:111905467-111905468	FDXACB1,ALG9,C11orf1	5x10^-4
rs10891301	rs7949136		11:111913363-111913364	FDXACB1,ALG9,C11orf1,DIXDC1	5x10^-5
rs10891303	rs7949136		11:111913363-111913364	HSPB2-C11orf52,HSPB2,CRYAB,ALG9,FDXACB1,C11orf1,DIXDC1	5x10^-5
rs10789854	rs7949136		11:111913363-111913364	DIXDC1,C11orf1,FDXACB1,ALG9	5x10^-5
rs2241828	rs11051005		12:30783474-30783475	RP11-77I22.2,TCONS_00020231,CAPRIN2	5x10^-6
rs12372721	rs10844652		12:33754876-33754877	YARS2	5x10^-4
rs10859557	rs10745659		12:94092689-94092690	SOCS2,SOCS2-AS1	5x10^-5
rs7953280	rs4761739		12:94106365-94106366	CRADD,SOCS2-AS1,SOCS2	5x10^-5
rs113583564	rs11057239	CCDC92	12:123768245-123768246	OGFOD2,ABCB9,RP11-197N18.2,ARL6IP4,PITPNM2,RP11-197N18.7	5x10^-6
rs112681709	rs11057239	CCDC92	12:123768245-123768246	OGFOD2,ABCB9,RP11-197N18.2,ARL6IP4,PITPNM2,RP11-197N18.7	5x10^-6
rs9596080	rs9316439		13:49895643-49895644	SETDB2,CAB39L	5x10^-5
rs1262864	rs2532964		13:50941344-50941345	DLEU1,TCONS_00021489	5x10^-4
rs10137475	rs2145598		14:58794000-58794001	ARID4A,RP11-349A22.5,C14orf37	5x10^-4
rs4779864	rs12592541	KLF13	15:31651795-31651796	TCONS_00024052,TCONS_00023602,TCONS_00024050,TCONS_00023603,RP11-16E12.2,TCONS_00024054,TCONS_00024051,TCONS_00024053,TCONS_00024055,TCONS_00023910,RP11-16E12.1,TCONS_00023341,TCONS_00023909,TCONS_00024057,TCONS_00023601	5x10^-7
rs755282	rs12592541	KLF13	15:31651795-31651796	TCONS_00024052,TCONS_00023602,TCONS_00024050,TCONS_00023603,RP11-16E12.2,TCONS_00024054,TCONS_00024051,TCONS_00024053,TCONS_00024055	5x10^-7
rs12592176	rs12592541	KLF13	15:31651795-31651796	TCONS_00024052,TCONS_00023602,TCONS_00024050,TCONS_00023603,RP11-16E12.2,TCONS_00024054,TCONS_00024051,TCONS_00024053,TCONS_00024055	5x10^-7
rs28705115	rs12592541	KLF13	15:31651795-31651796	TCONS_00023910,TCONS_00023341,RP11-16E12.1,TCONS_00023909	5x10^-7
rs4924575	rs1105881		15:42072529-42072530	MAPKBP1,RP11-107F6.3	5x10^-4
rs11638944	rs750460		15:74241505-74241506	LOXL1-AS1,LOXL1	5x10^-4
rs62034711	rs12325187		16:3364996-3364997	ZNF263,ZNF174,ZSCAN32	5x10^-4
rs3810817	rs2072151		16:4391039-4391040	TCONS_00024950,TCONS_00024949,RP11-462G12.1,TCONS_00024562,TCONS_00024564	5x10^-7
rs7186310	rs16957291		16:67326101-67326102	PLEKHG4	5x10^-4
rs112291748	rs16957415		16:67418956-67418957	ELMO3	5x10^-5
rs3892816	rs16957415		16:67418956-67418957	ELMO3,LRRC36,KCTD19,PLEKHG4	5x10^-5
rs9922085	rs16957415		16:67418956-67418957	LRRC36,KCTD19	5x10^-5
rs28490940	rs7184978		16:67736839-67736840	SLC12A4,DUS2,CTC-479C5.6,DDX28	5x10^-4
rs28668419	rs7184978		16:67736839-67736840	SLC12A4,DUS2,CTC-479C5.6,DDX28	5x10^-4
rs76944074	rs7184978		16:67736839-67736840	NRN1L	5x10^-4
rs114884917	rs7184978		16:67736839-67736840	NRN1L	5x10^-4
rs11558534	rs7184978		16:67736839-67736840	DUS2,DDX28,NRN1L,PSMB10,CTC-479C5.12,RANBP10,TSNAXIP1,GFOD2	5x10^-4
rs14178	rs7185536		16:67992163-67992164	CTC-479C5.12,PSMB10,NRN1L,DUS2,DDX28,NUTF2,CENPT	5x10^-4
rs2966095	rs2966097	CMIP	16:81549707-81549708	CMIP	5x10^-4
rs2376585	rs8069521		17:76421708-76421709	AC061992.2,SOCS3,TCONS_00025512,RP11-806H10.4,TCONS_00025513,TCONS_00025984,TCONS_00025511,RP11-219G17.4,PGS1	5x10^-4
rs72921252	rs8069521		17:76421708-76421709	PGS1	5x10^-4
rs72921250	rs8069521		17:76421708-76421709	PGS1	5x10^-4
rs72907478	rs8069521		17:76421708-76421709	TCONS_00025511,RP11-219G17.4	5x10^-4
rs1893528	rs1838963		18:46679867-46679868	SMAD7	5x10^-4
rs7233575	rs1838963		18:46679867-46679868	SMAD7	5x10^-4
rs1893529	rs1838963		18:46679867-46679868	SMAD7	5x10^-4
rs1569959	rs13042216		20:21222125-21222126	MRPS11P1,TCONS_l2_00016499	5x10^-4
rs2252714	rs13042216		20:21222125-21222126	MRPS11P1,TCONS_l2_00016499	5x10^-4
rs6058193	rs11696967	GDF5	20:33743608-33743609	MMP24-AS1,EDEM2	5x10^-5
rs6058194	rs11696967	GDF5	20:33743608-33743609	PROCR	5x10^-5
rs915787	rs2839110		21:47538959-47538960	COL6A1,TCONS_00029187	5x10^-4
rs9978055	rs2839110		21:47538959-47538960	TCONS_00029187,COL6A1	5x10^-4
rs16986873	rs9625657	ZNRF3-KREMEN1	22:29349666-29349667	ZNRF3-AS1	5x10^-4
