# Supplementary material for: Biological constraints on GWAS SNPs at suggestive significance thresholds reveal additional BMI loci
Source: eLife journal article supplement (doi:10.7554/elife.62206), 2021-01-18
Supplement: supp [file StatisticalClassifications-BMI+WHRadjBMI.xlsx]

## Sheet: BMI 2010-2015
Cell Type	Band Level	True Positives	False Positives	False Negatives	True Negatives	Sensitivity	Specificity	False Positives Rate	False Negative Rate
Adipose	5x10^-7	3	0	11	5	0.214286	1	0	0.785714
Adipose	5x10^-6	4	0	21	30	0.16	1	0	0.84
Adipose	5x10^-5	6	7	37	113	0.139535	0.941667	0.0583333	0.860465
Adipose	5x10^-4	9	46	47	489	0.160714	0.914019	0.0859813	0.839286
Hypothalamic Neurons	5x10^-7	1	0	13	5	0.0714286	1	0	0.928571
Hypothalamic Neurons	5x10^-6	2	0	23	30	0.08	1	0	0.92
Hypothalamic Neurons	5x10^-5	2	3	41	117	0.0465116	0.975	0.025	0.953488
Hypothalamic Neurons	5x10^-4	4	37	52	498	0.0714286	0.930841	0.0691589	0.928571
All Cells	5x10^-7	4	0	10	5	0.285714	1	0	0.714286
All Cells	5x10^-6	4	0	21	30	0.16	1	0	0.84
All Cells	5x10^-5	6	9	37	111	0.139535	0.925	0.075	0.860465
All Cells	5x10^-4	11	67	45	468	0.196429	0.874766	0.125234	0.803571
Negative Adipose	5x10^-7	2.7657	1.2343	8.2343	3.7657	0.251427	0.75314	0.24686	0.748573
Negative Adipose	5x10^-6	2.7657	1.2343	18.2343	28.7657	0.1317	0.958857	0.0411433	0.8683
Negative Adipose	5x10^-5	5.3373	9.6627	31.6627	103.337	0.144251	0.914489	0.0855106	0.855749
Negative Adipose	5x10^-4	10.4154	67.5846	36.5846	421.415	0.221604	0.86179	0.13821	0.778396
Negative Hypothalamic Neurons	5x10^-7	2.8884	1.1116	10.1116	3.8884	0.222185	0.77768	0.22232	0.777815
Negative Hypothalamic Neurons	5x10^-6	2.8884	1.1116	20.1116	28.8884	0.125583	0.962947	0.0370533	0.874417
Negative Hypothalamic Neurons	5x10^-5	5.628	9.372	35.372	107.628	0.137268	0.919897	0.0801026	0.862732
Negative Hypothalamic Neurons	5x10^-4	11.1005	66.8995	40.8995	431.101	0.213471	0.865664	0.134336	0.786529
Negative All Cells	5x10^-7	2.6675	1.3325	7.3325	3.6675	0.26675	0.7335	0.2665	0.73325
Negative All Cells	5x10^-6	2.6675	1.3325	18.3325	28.6675	0.127024	0.955583	0.0444167	0.872976
Negative All Cells	5x10^-5	5.2724	9.7276	31.7276	101.272	0.142497	0.912364	0.087636	0.857503
Negative All Cells	5x10^-4	10.3012	67.6988	34.6988	400.301	0.228916	0.855344	0.144656	0.771084
Naive Sampling	5x10^-7	2.9395	1.0605	11.0605	3.9395	0.209964	0.7879	0.2121	0.790036
Naive Sampling	5x10^-6	2.9395	1.0605	22.0605	28.9395	0.11758	0.96465	0.03535	0.88242
Naive Sampling	5x10^-5	5.7067	9.2933	37.2933	110.707	0.132714	0.922556	0.0774442	0.867286
Naive Sampling	5x10^-4	11.2176	66.7824	44.7824	468.218	0.200314	0.875173	0.124827	0.799686
Unfiltered	5x10^-7	14	5	0	0	1	0	1	0
Unfiltered	5x10^-6	25	30	0	0	1	0	1	0
Unfiltered	5x10^-5	43	120	0	0	1	0	1	0
Unfiltered	5x10^-4	56	535	0	0	1	0	1	0

## Sheet: BMI 2010-2018
Cell Type	Band Level	True Positives	False Positives	False Negatives	True Negatives	Sensitivity	Specificity	False Positives Rate	False Negative Rate
Adipose	5x10^-7	3	0	11	5	0.214286	1	0	0.785714
Adipose	5x10^-6	4	0	33	18	0.108108	1	0	0.891892
Adipose	5x10^-5	12	1	93	57	0.114286	0.982759	0.0172414	0.885714
Adipose	5x10^-4	34	21	227	309	0.130268	0.936364	0.0636364	0.869732
Hypothalamic Neurons	5x10^-7	1	0	13	5	0.0714286	1	0	0.928571
Hypothalamic Neurons	5x10^-6	2	0	35	18	0.0540541	1	0	0.945946
Hypothalamic Neurons	5x10^-5	4	1	101	57	0.0380952	0.982759	0.0172414	0.961905
Hypothalamic Neurons	5x10^-4	22	19	239	311	0.0842912	0.942424	0.0575758	0.915709
All Cells	5x10^-7	4	0	10	5	0.285714	1	0	0.714286
All Cells	5x10^-6	4	0	33	18	0.108108	1	0	0.891892
All Cells	5x10^-5	13	2	92	56	0.12381	0.965517	0.0344828	0.87619
All Cells	5x10^-4	45	34	216	296	0.172414	0.89697	0.10303	0.827586
Negative Adipose	5x10^-7	2.7616	1.2384	8.2384	3.7616	0.251055	0.75232	0.24768	0.748945
Negative Adipose	5x10^-6	2.7616	1.2384	30.2384	16.7616	0.0836848	0.9312	0.0688	0.916315
Negative Adipose	5x10^-5	9.5466	5.4534	83.4534	51.5466	0.102652	0.904326	0.0956737	0.897348
Negative Adipose	5x10^-4	36.2478	42.7522	190.752	266.248	0.159682	0.861643	0.138357	0.840318
Negative Hypothalamic Neurons	5x10^-7	2.8802	1.1198	10.1198	3.8802	0.221554	0.77604	0.22396	0.778446
Negative Hypothalamic Neurons	5x10^-6	2.8802	1.1198	32.1198	16.8802	0.0822914	0.937789	0.0622111	0.917709
Negative Hypothalamic Neurons	5x10^-5	9.8872	5.1128	91.1128	51.8872	0.0978931	0.910302	0.0896982	0.902107
Negative Hypothalamic Neurons	5x10^-4	37.3263	41.6737	201.674	269.326	0.156177	0.866001	0.133999	0.843823
Negative All Cells	5x10^-7	2.6784	1.3216	7.3216	3.6784	0.26784	0.73568	0.26432	0.73216
Negative All Cells	5x10^-6	2.6784	1.3216	30.3216	16.6784	0.0811636	0.926578	0.0734222	0.918836
Negative All Cells	5x10^-5	9.4938	5.5062	82.5062	50.4938	0.103193	0.901675	0.098325	0.896807
Negative All Cells	5x10^-4	36.1234	42.8766	179.877	253.123	0.167238	0.855147	0.144853	0.832762
Naive Sampling	5x10^-7	2.9589	1.0411	11.0411	3.9589	0.21135	0.79178	0.20822	0.78865
Naive Sampling	5x10^-6	2.9589	1.0411	34.0411	16.9589	0.0799703	0.942161	0.0578389	0.92003
Naive Sampling	5x10^-5	10.0087	4.9913	94.9913	53.0087	0.095321	0.913943	0.0860569	0.904679
Naive Sampling	5x10^-4	37.9004	41.0996	223.1	288.9	0.145212	0.875456	0.124544	0.854788
Unfiltered	5x10^-7	14	5	0	0	1	0	1	0
Unfiltered	5x10^-6	37	18	0	0	1	0	1	0
Unfiltered	5x10^-5	105	58	0	0	1	0	1	0
Unfiltered	5x10^-4	261	330	0	0	1	0	1	0

## Sheet: BMI 2015-2018
Cell Type	Band Level	True Positives	False Positives	False Negatives	True Negatives	Sensitivity	Specificity	False Positives Rate	False Negative Rate
Adipose	5x10^-7	7	0	39	19	0.152174	1	0	0.847826
Adipose	5x10^-6	22	1	52	33	0.297297	0.970588	0.0294118	0.702703
Adipose	5x10^-5	49	11	99	89	0.331081	0.89	0.11	0.668919
Adipose	5x10^-4	89	54	197	434	0.311189	0.889344	0.110656	0.688811
Hypothalamic Neurons	5x10^-7	3	0	43	19	0.0652174	1	0	0.934783
Hypothalamic Neurons	5x10^-6	9	1	65	33	0.121622	0.970588	0.0294118	0.878378
Hypothalamic Neurons	5x10^-5	28	6	120	94	0.189189	0.94	0.06	0.810811
Hypothalamic Neurons	5x10^-4	59	31	227	457	0.206294	0.936475	0.0635246	0.793706
All Cells	5x10^-7	8	0	38	19	0.173913	1	0	0.826087
All Cells	5x10^-6	26	2	48	32	0.351351	0.941176	0.0588235	0.648649
All Cells	5x10^-5	57	14	91	86	0.385135	0.86	0.14	0.614865
All Cells	5x10^-4	117	67	169	421	0.409091	0.862705	0.137295	0.590909
Negative Adipose	5x10^-7	5.398	2.602	33.602	16.398	0.13841	0.863053	0.136947	0.86159
Negative Adipose	5x10^-6	17.4918	10.5082	34.5082	22.4918	0.336381	0.68157	0.31843	0.663619
Negative Adipose	5x10^-5	39.4087	31.5913	59.5913	57.4087	0.398068	0.645042	0.354958	0.601932
Negative Adipose	5x10^-4	71.2414	112.759	125.759	321.241	0.361631	0.740188	0.259812	0.638369
Negative Hypothalamic Neurons	5x10^-7	5.5795	2.4205	37.4205	16.5795	0.129756	0.872605	0.127395	0.870244
Negative Hypothalamic Neurons	5x10^-6	18.7578	9.2422	46.2422	23.7578	0.288582	0.719933	0.280067	0.711418
Negative Hypothalamic Neurons	5x10^-5	42.1723	28.8277	77.8277	65.1723	0.351436	0.693322	0.306678	0.648564
Negative Hypothalamic Neurons	5x10^-4	76.2719	107.728	150.728	349.272	0.336	0.764271	0.235729	0.664
Negative All Cells	5x10^-7	5.3341	2.6659	32.6659	16.3341	0.140371	0.859689	0.140311	0.859629
Negative All Cells	5x10^-6	17.1735	10.8265	30.8265	21.1735	0.357781	0.661672	0.338328	0.642219
Negative All Cells	5x10^-5	38.485	32.515	52.515	53.485	0.422912	0.621919	0.378081	0.577088
Negative All Cells	5x10^-4	66.8983	117.102	102.102	303.898	0.395848	0.721849	0.278151	0.604152
Naive Sampling	5x10^-7	5.6786	2.3214	40.3214	16.6786	0.123448	0.877821	0.122179	0.876552
Naive Sampling	5x10^-6	19.3217	8.6783	54.6783	25.3217	0.261104	0.744756	0.255244	0.738896
Naive Sampling	5x10^-5	44.4903	26.5097	103.51	73.4903	0.30061	0.734903	0.265097	0.69939
Naive Sampling	5x10^-4	83.4385	100.561	202.561	387.438	0.291743	0.793931	0.206069	0.708257
Unfiltered	5x10^-7	46	19	0	0	1	0	1	0
Unfiltered	5x10^-6	74	34	0	0	1	0	1	0
Unfiltered	5x10^-5	148	100	0	0	1	0	1	0
Unfiltered	5x10^-4	286	488	0	0	1	0	1	0

## Sheet: WHRadjBMI 2010-2015
Cell Type	Band Level	True Positives	False Positives	False Negatives	True Negatives	Sensitivity	Specificity	False Positives Rate	False Negative Rate
Adipose	5x10^-7	1	0	2	1	0.333333	1	0	0.666667
Adipose	5x10^-6	4	2	7	19	0.363636	0.904762	0.0952381	0.636364
Adipose	5x10^-5	10	9	12	79	0.454545	0.897727	0.102273	0.545455
Adipose	5x10^-4	13	49	25	466	0.342105	0.904854	0.0951456	0.657895
Hypothalamic Neurons	5x10^-7	1	0	2	1	0.333333	1	0	0.666667
Hypothalamic Neurons	5x10^-6	2	0	9	21	0.181818	1	0	0.818182
Hypothalamic Neurons	5x10^-5	5	3	17	85	0.227273	0.965909	0.0340909	0.772727
Hypothalamic Neurons	5x10^-4	5	25	33	490	0.131579	0.951456	0.0485437	0.868421
All Cells	5x10^-7	1	0	2	1	0.333333	1	0	0.666667
All Cells	5x10^-6	4	2	7	19	0.363636	0.904762	0.0952381	0.636364
All Cells	5x10^-5	11	9	11	79	0.5	0.897727	0.102273	0.5
All Cells	5x10^-4	14	57	24	458	0.368421	0.88932	0.11068	0.631579
Negative Adipose	5x10^-7	0.672	0.328	1.328	0.672	0.336	0.672	0.328	0.664
Negative Adipose	5x10^-6	1.9284	4.0716	5.0716	14.9284	0.275486	0.785705	0.214295	0.724514
Negative Adipose	5x10^-5	3.5897	16.4103	8.4103	62.5897	0.299142	0.792275	0.207725	0.700858
Negative Adipose	5x10^-4	5.9168	65.0832	19.0832	400.917	0.236672	0.860336	0.139664	0.763328
Negative Hypothalamic Neurons	5x10^-7	0.6666	0.3334	1.3334	0.6666	0.3333	0.6666	0.3334	0.6667
Negative Hypothalamic Neurons	5x10^-6	2.0905	3.9095	6.9095	17.0905	0.232278	0.813833	0.186167	0.767722
Negative Hypothalamic Neurons	5x10^-5	4.2678	15.7322	12.7322	69.2678	0.251047	0.814915	0.185085	0.748953
Negative Hypothalamic Neurons	5x10^-4	7.1657	63.8343	25.8343	426.166	0.217142	0.869726	0.130274	0.782858
Negative All Cells	5x10^-7	0.668	0.332	1.332	0.668	0.334	0.668	0.332	0.666
Negative All Cells	5x10^-6	1.9337	4.0663	5.0663	14.9337	0.276243	0.785984	0.214016	0.723757
Negative All Cells	5x10^-5	3.4499	16.5501	7.5501	62.4499	0.313627	0.790505	0.209495	0.686373
Negative All Cells	5x10^-4	5.7076	65.2924	18.2924	392.708	0.237817	0.85744	0.14256	0.762183
Naive Sampling	5x10^-7	0.7542	0.2458	2.2458	0.7542	0.2514	0.7542	0.2458	0.7486
Naive Sampling	5x10^-6	2.4175	3.5825	8.5825	17.4175	0.219773	0.829405	0.170595	0.780227
Naive Sampling	5x10^-5	5.0511	14.9489	16.9489	73.0511	0.229595	0.830126	0.169874	0.770405
Naive Sampling	5x10^-4	8.209	62.791	29.791	452.209	0.216026	0.878076	0.121924	0.783974
Unfiltered	5x10^-7	3	1	0	0	1	0	1	0
Unfiltered	5x10^-6	11	21	0	0	1	0	1	0
Unfiltered	5x10^-5	22	88	0	0	1	0	1	0
Unfiltered	5x10^-4	38	515	0	0	1	0	1	0

## Sheet: WHRadjBMI 2010-2018
Cell Type	Band Level	True Positives	False Positives	False Negatives	True Negatives	Sensitivity	Specificity	False Positives Rate	False Negative Rate
Adipose	5x10^-7	1	0	2	1	0.333333	1	0	0.666667
Adipose	5x10^-6	5	1	15	11	0.25	0.916667	0.0833333	0.75
Adipose	5x10^-5	12	7	34	57	0.26087	0.890625	0.109375	0.73913
Adipose	5x10^-4	33	29	88	403	0.272727	0.93287	0.0671296	0.727273
Hypothalamic Neurons	5x10^-7	1	0	2	1	0.333333	1	0	0.666667
Hypothalamic Neurons	5x10^-6	2	0	18	12	0.1	1	0	0.9
Hypothalamic Neurons	5x10^-5	7	1	39	63	0.152174	0.984375	0.015625	0.847826
Hypothalamic Neurons	5x10^-4	16	14	105	418	0.132231	0.967593	0.0324074	0.867769
All Cells	5x10^-7	1	0	2	1	0.333333	1	0	0.666667
All Cells	5x10^-6	5	1	15	11	0.25	0.916667	0.0833333	0.75
All Cells	5x10^-5	13	7	33	57	0.282609	0.890625	0.109375	0.717391
All Cells	5x10^-4	36	35	85	397	0.297521	0.918981	0.0810185	0.702479
Negative Adipose	5x10^-7	0.6709	0.3291	1.3291	0.6709	0.33545	0.6709	0.3291	0.66455
Negative Adipose	5x10^-6	3.5354	2.4646	11.4646	8.5354	0.235693	0.775945	0.224055	0.764307
Negative Adipose	5x10^-5	8.533	11.467	25.467	45.533	0.250971	0.798825	0.201175	0.749029
Negative Adipose	5x10^-4	17.1575	53.8425	70.8425	349.158	0.194972	0.866396	0.133604	0.805028
Negative Hypothalamic Neurons	5x10^-7	0.6689	0.3311	1.3311	0.6689	0.33445	0.6689	0.3311	0.66555
Negative Hypothalamic Neurons	5x10^-6	3.6625	2.3375	14.3375	9.6625	0.203472	0.805208	0.194792	0.796528
Negative Hypothalamic Neurons	5x10^-5	8.8059	11.1941	30.1941	51.8059	0.225792	0.822316	0.177684	0.774208
Negative Hypothalamic Neurons	5x10^-4	18.5654	52.4346	86.4346	365.565	0.176813	0.874558	0.125442	0.823187
Negative All Cells	5x10^-7	0.6658	0.3342	1.3342	0.6658	0.3329	0.6658	0.3342	0.6671
Negative All Cells	5x10^-6	3.5354	2.4646	11.4646	8.5354	0.235693	0.775945	0.224055	0.764307
Negative All Cells	5x10^-5	8.4341	11.5659	24.5659	45.4341	0.255579	0.797089	0.202911	0.744421
Negative All Cells	5x10^-4	16.8674	54.1326	68.1326	342.867	0.19844	0.863646	0.136354	0.80156
Naive Sampling	5x10^-7	0.7455	0.2545	2.2545	0.7455	0.2485	0.7455	0.2545	0.7515
Naive Sampling	5x10^-6	3.8482	2.1518	16.1518	9.8482	0.19241	0.820683	0.179317	0.80759
Naive Sampling	5x10^-5	9.5133	10.4867	36.4867	53.5133	0.206811	0.836145	0.163855	0.793189
Naive Sampling	5x10^-4	20.2271	50.7729	100.773	381.227	0.167166	0.88247	0.11753	0.832834
Unfiltered	5x10^-7	3	1	0	0	1	0	1	0
Unfiltered	5x10^-6	20	12	0	0	1	0	1	0
Unfiltered	5x10^-5	46	64	0	0	1	0	1	0
Unfiltered	5x10^-4	121	432	0	0	1	0	1	0

## Sheet: WHRadjBMI 2015-2018
Cell Type	Band Level	True Positives	False Positives	False Negatives	True Negatives	Sensitivity	Specificity	False Positives Rate	False Negative Rate
Adipose	5x10^-7	3	1	17	16	0.15	0.941176	0.0588235	0.85
Adipose	5x10^-6	9	2	55	59	0.140625	0.967213	0.0327869	0.859375
Adipose	5x10^-5	27	9	117	166	0.1875	0.948571	0.0514286	0.8125
Adipose	5x10^-4	58	42	228	640	0.202797	0.938416	0.0615836	0.797203
Hypothalamic Neurons	5x10^-7	1	1	19	16	0.05	0.941176	0.0588235	0.95
Hypothalamic Neurons	5x10^-6	4	2	60	59	0.0625	0.967213	0.0327869	0.9375
Hypothalamic Neurons	5x10^-5	14	4	130	171	0.0972222	0.977143	0.0228571	0.902778
Hypothalamic Neurons	5x10^-4	29	26	257	656	0.101399	0.961877	0.0381232	0.898601
All Cells	5x10^-7	3	2	17	15	0.15	0.882353	0.117647	0.85
All Cells	5x10^-6	9	3	55	58	0.140625	0.95082	0.0491803	0.859375
All Cells	5x10^-5	28	9	116	166	0.194444	0.948571	0.0514286	0.805556
All Cells	5x10^-4	65	56	221	626	0.227273	0.917889	0.0821114	0.772727
Negative Adipose	5x10^-7	2.5817	2.4183	14.4183	13.5817	0.151865	0.848856	0.151144	0.848135
Negative Adipose	5x10^-6	5.9554	6.0446	49.0446	52.9554	0.10828	0.897549	0.102451	0.89172
Negative Adipose	5x10^-5	16.2219	20.7781	100.778	145.222	0.138649	0.874831	0.125169	0.861351
Negative Adipose	5x10^-4	37.6774	83.3226	190.323	556.677	0.165252	0.869808	0.130192	0.834748
Negative Hypothalamic Neurons	5x10^-7	2.7276	2.2724	16.2724	13.7276	0.143558	0.857975	0.142025	0.856442
Negative Hypothalamic Neurons	5x10^-6	6.2381	5.7619	53.7619	53.2381	0.103968	0.902341	0.0976593	0.896032
Negative Hypothalamic Neurons	5x10^-5	16.9212	20.0788	113.079	150.921	0.130163	0.88258	0.11742	0.869837
Negative Hypothalamic Neurons	5x10^-4	39.8912	81.1088	217.109	574.891	0.155219	0.876359	0.123641	0.844781
Negative All Cells	5x10^-7	2.6325	2.3675	14.3675	12.6325	0.154853	0.842167	0.157833	0.845147
Negative All Cells	5x10^-6	6.0172	5.9828	48.9828	52.0172	0.109404	0.896848	0.103152	0.890596
Negative All Cells	5x10^-5	16.162	20.838	99.838	145.162	0.139328	0.87447	0.12553	0.860672
Negative All Cells	5x10^-4	37.4094	83.5906	183.591	542.409	0.169273	0.866469	0.133531	0.830727
Naive Sampling	5x10^-7	2.7089	2.2911	17.2911	14.7089	0.135445	0.865229	0.134771	0.864555
Naive Sampling	5x10^-6	6.2825	5.7175	57.7175	55.2825	0.0981641	0.90627	0.0937295	0.901836
Naive Sampling	5x10^-5	17.4894	19.5106	126.511	155.489	0.121454	0.888511	0.111489	0.878546
Naive Sampling	5x10^-4	41.6966	79.3034	244.303	602.697	0.145792	0.883719	0.116281	0.854208
Unfiltered	5x10^-7	20	17	0	0	1	0	1	0
Unfiltered	5x10^-6	64	61	0	0	1	0	1	0
Unfiltered	5x10^-5	144	175	0	0	1	0	1	0
Unfiltered	5x10^-4	286	682	0	0	1	0	1	0
